# Supplementary material for: The respiratory microbiota alpha-diversity in chronic lung diseases: first systematic review and meta-analysis
Source: PubMed Central journal article supplement (PMC9396807; doi:10.1186/s12931-022-02132-4), 2022-08-23

**Additional Files**

| Disease      | Variable        | ANOVA p-value |
|--------------|-----------------|---------------|
| Asthma       | Sample          | 0.81          |
|              | Continent       | 0.01          |
|              | Sequencing      | 0.95          |
|              | Rarefaction     | 0.82          |
|              | Taxonomic level | 0.06          |
|              | ASV method      | 0.48          |
|              | Score           | 0.55          |
| COPD         | Sample          | 0.75          |
|              | Continent       | 0.10          |
|              | Sequencing      | 0.13          |
|              | Rarefaction     | 0.29          |
|              | Taxonomic level | 0.20          |
|              | ASV method      | 0.36          |
|              | Score           | 0.70          |
| CF           | Sample          | 0.09          |
|              | Continent       | 0.30          |
|              | Sequencing      | 0.02          |
|              | Rarefaction     | 0.28          |
|              | Taxonomic level | 0.28          |
|              | ASV             | 0.13          |
|              | Score           | 0.31          |
| All diseases | Sample          | 0.12          |
|              | Continent       | 0.59          |
|              | Sequencing      | 0.12          |
|              | Rarefaction     | 0.53          |
|              | Taxonomic level | 0.02          |
|              | ASV             | 0.29          |
|              | Score           | 0.44          |

**Table 5** ANOVA p-values to assess the effect of characteristics on the difference in Shannon values between cases and controls. A random-effects model is applied per characteristic (no adjustment for other characteristics or for the comparison group is performed because of the small number of studies).

**Figure 4** FAMD biplot. Studies are represented by blue points (Byu17 [46] Car13 [27], Cob15 [45], Den16 [29], Ein16 [39], Erb11 [37], Fei17 [25], Gol13 [28], Hua20 [34], Kim17 [4], Lee18 [20], Li17 [32], Liu20 [31], Mar13 [33], Mil15 [41], Mun16 [35], Nar17 [44], Par14 [36], Ple19 [42], Pra12 [38], Sor20 [43], Sve17 [30], Wan20 [21], Wil09 [23]), continuous variables (cases and controls group sizes) are represented by red vectors and the modalities of the categorical variables (type of samples: bronchoalveolar lavage (BAL), sputum, sputum (induced), lower airways (LA), upper airways (UA)); the samples origin continent: Asia, America, or Europe; the NGS sequencing method: 454 pyrosequencing for Pyrosequencing such as 454 FLX (Roche<sup>©</sup>), Illumina for bridge amplification such as MiSeq or HiSeq (Illumina<sup>©</sup>), 454 pyrosequencing/Illumina for combined methods, PacBio/Illumina for long read sequencing such as PacBio (Pacific Biosciences<sup>©</sup>) combined with Illumina, Other for the other combinations; the use of rarefaction analysis: YES or NO/NC (no or not stated clearly); the taxonomic level used: OTU vs. Genus); the clustering method: OTU vs. ASV) are represented by black triangles. As AFDM algorithm works like principal component analysis (PCA) for quantitative variables and like multiple correspondence analysis (MCA) for qualitative variables, the contributing quantitative variables are highlighted using vectors (referring to the circle of correlations as in PCA) while the qualitative variables are represented according to their exact barycentre (referring to their contribution values in MCA); all the variables being normalized during the analysis to balance the influence of each set of variables.

**Figure 5** FAMD biplot. Studies (Byu17 [46] Car13 [27], Cob15 [45], Den16 [29], Ein16 [39], Erb11 [37], Fei17 [25], Gol13 [28], Hua20 [34], Kim17 [4], Lee18 [20], Li17 [32], Liu20 [31], Mar13 [33], Mil15 [41], Mun16 [35], Nar17 [44], Par14 [36], Ple19 [42], Pra12 [38], Sor20 [43], Sve17 [30], Wan20 [21]) are colored by the size of the case group. The farther to the right, the larger the sample size.

**Figure 6** FAMD biplot. Studies (Byu17 [46] Car13 [27], Cob15 [45], Den16 [29], Ein16 [39], Erb11 [37], Fei17 [25], Gol13 [28], Hua20 [34], Kim17 [4], Lee18 [20], Li17 [32], Liu20 [31], Mar13 [33], Mil15 [41], Mun16 [35], Nar17 [44], Par14 [36], Ple19 [42], Pra12 [38], Sor20 [43], Sve17 [30], Wan20 [21]) are colored by the size of the control group. The studies with the largest control sample size are located at the lower right.

**Figure 7** FAMD biplot. Studies (Byu17 [46] Car13 [27], Cob15 [45], Den16 [29], Ein16 [39], Erb11 [37], Fei17 [25], Gol13 [28], Hua20 [34], Kim17 [4], Lee18 [20], Li17 [32], Liu20 [31], Mar13 [33], Mil15 [41], Mun16 [35], Nar17 [44], Par14 [36], Ple19 [42], Pra12 [38], Sor20 [43], Sve17 [30], Wan20 [21]) are colored by the type of sample. Studies based on BAL samples are mainly located at the top left of the graph, studies based on sputum (induced) samples are mainly located at the right, studies based on UA samples are mainly located at the top, studies based on LA samples are mainly located at the bottom left of the graph. Finally, studies based on sputum samples are mainly scattered in the center of the graph.

**Figure 8** FAMD biplot. Studies (Byu17 [46] Car13 [27], Cob15 [45], Den16 [29], Ein16 [39], Erb11 [37], Fei17 [25], Gol13 [28], Hua20 [34], Kim17 [4], Lee18 [20], Li17 [32], Liu20 [31], Mar13 [33], Mil15 [41], Mun16 [35], Nar17 [44], Par14 [36], Ple19 [42], Pra12 [38], Sor20 [43], Sve17 [30], Wan20 [21]) are colored by the samples origin continent. Asian studies are clearly clustered in the upper right diagonal. American and European studies are mixed in the opposite direction.

**Figure 9** FAMD biplot. Studies (Byu17 [46] Car13 [27], Cob15 [45], Den16 [29], Ein16 [39], Erb11 [37], Fei17 [25], Gol13 [28], Hua20 [34], Kim17 [4], Lee18 [20], Li17 [32], Liu20 [31], Mar13 [33], Mil15 [41], Mun16 [35], Nar17 [44], Par14 [36], Ple19 [42], Pra12 [38], Sor20 [43], Sve17 [30], Wan20 [21]) are colored by the NGS sequencing method. 454 pyrosequencing, for Pyrosequencing such as 454 FLX (Roche<sup>©</sup>), are clustered in the center; Illumina, for bridge amplification such as MiSeq or HiSeq (Illumina<sup>©</sup>), are mostly at the bottom left; 454 pyrosequencing/Illumina, for combined methods, is isolated at the top right; PacBio/Illumina, for long read sequencing such as PacBio (Pacific Biosciences<sup>©</sup>) combined with Illumina, is isolated at the bottom right; Other, for the other combinations, are clustered in the top center.

**Figure 10** FAMD biplot. Studies (Byu17 [46] Car13 [27], Cob15 [45], Den16 [29], Ein16 [39], Erb11 [37], Fei17 [25], Gol13 [28], Hua20 [34], Kim17 [4], Lee18 [20], Li17 [32], Liu20 [31], Mar13 [33], Mil15 [41], Mun16 [35], Nar17 [44], Par14 [36], Ple19 [42], Pra12 [38], Sor20 [43], Sve17 [30], Wan20 [21]) are colored by the use of rarefaction analysis: YES or NO/NC (no or not stated clearly). Studies with rarefaction analysis are mainly grouped on the bottom right, the others are mainly grouped on the top left.

**Figure 11** FAMD biplot. Studies (Byu17 [46] Car13 [27], Cob15 [45], Den16 [29], Ein16 [39], Erb11 [37], Fei17 [25], Gol13 [28], Hua20 [34], Kim17 [4], Lee18 [20], Li17 [32], Liu20 [31], Mar13 [33], Mil15 [41], Mun16 [35], Nar17 [44], Par14 [36], Ple19 [42], Pra12 [38], Sor20 [43], Sve17 [30], Wan20 [21]) are colored by the taxonomic level used (OTU vs. Genus). Studies at OTU level are mainly grouped on the bottom right, studies at genus level are mainly grouped on the top left.

**Figure 12** FAMD biplot. Studies (Byu17 [46] Car13 [27], Cob15 [45], Den16 [29], Ein16 [39], Erb11 [37], Fei17 [25], Gol13 [28], Hua20 [34], Kim17 [4], Lee18 [20], Li17 [32], Liu20 [31], Mar13 [33], Mil15 [41], Mun16 [35], Nar17 [44], Par14 [36], Ple19 [42], Pra12 [38], Sor20 [43], Sve17 [30], Wan20 [21]) are colored by the clustering method: OTU (No ASV) vs. ASV. Only two studies (located at the bottom right of the graph, not isolated) used a ASV-based approach.

**Figure 13** FAMD biplot vs. quality score. Studies (Byu17 [46] Car13 [27], Cob15 [45], Den16 [29], Ein16 [39], Erb11 [37], Fei17 [25], Gol13 [28], Hua20 [34], Kim17 [4], Lee18 [20], Li17 [32], Liu20 [31], Mar13 [33], Mil15 [41], Mun16 [35], Nar17 [44], Par14 [36], Ple19 [42], Pra12 [38], Sor20 [43], Sve17 [30], Wan20 [21]) are colored by the sum of expert assessments. The study rated with a low quality score is fairly isolated in the upper left. However, the other studies are mixed together. Their arrangement in the graph cannot be interpreted in terms of quality score.

# Individuals, qualitative and quantitative variables' modalities

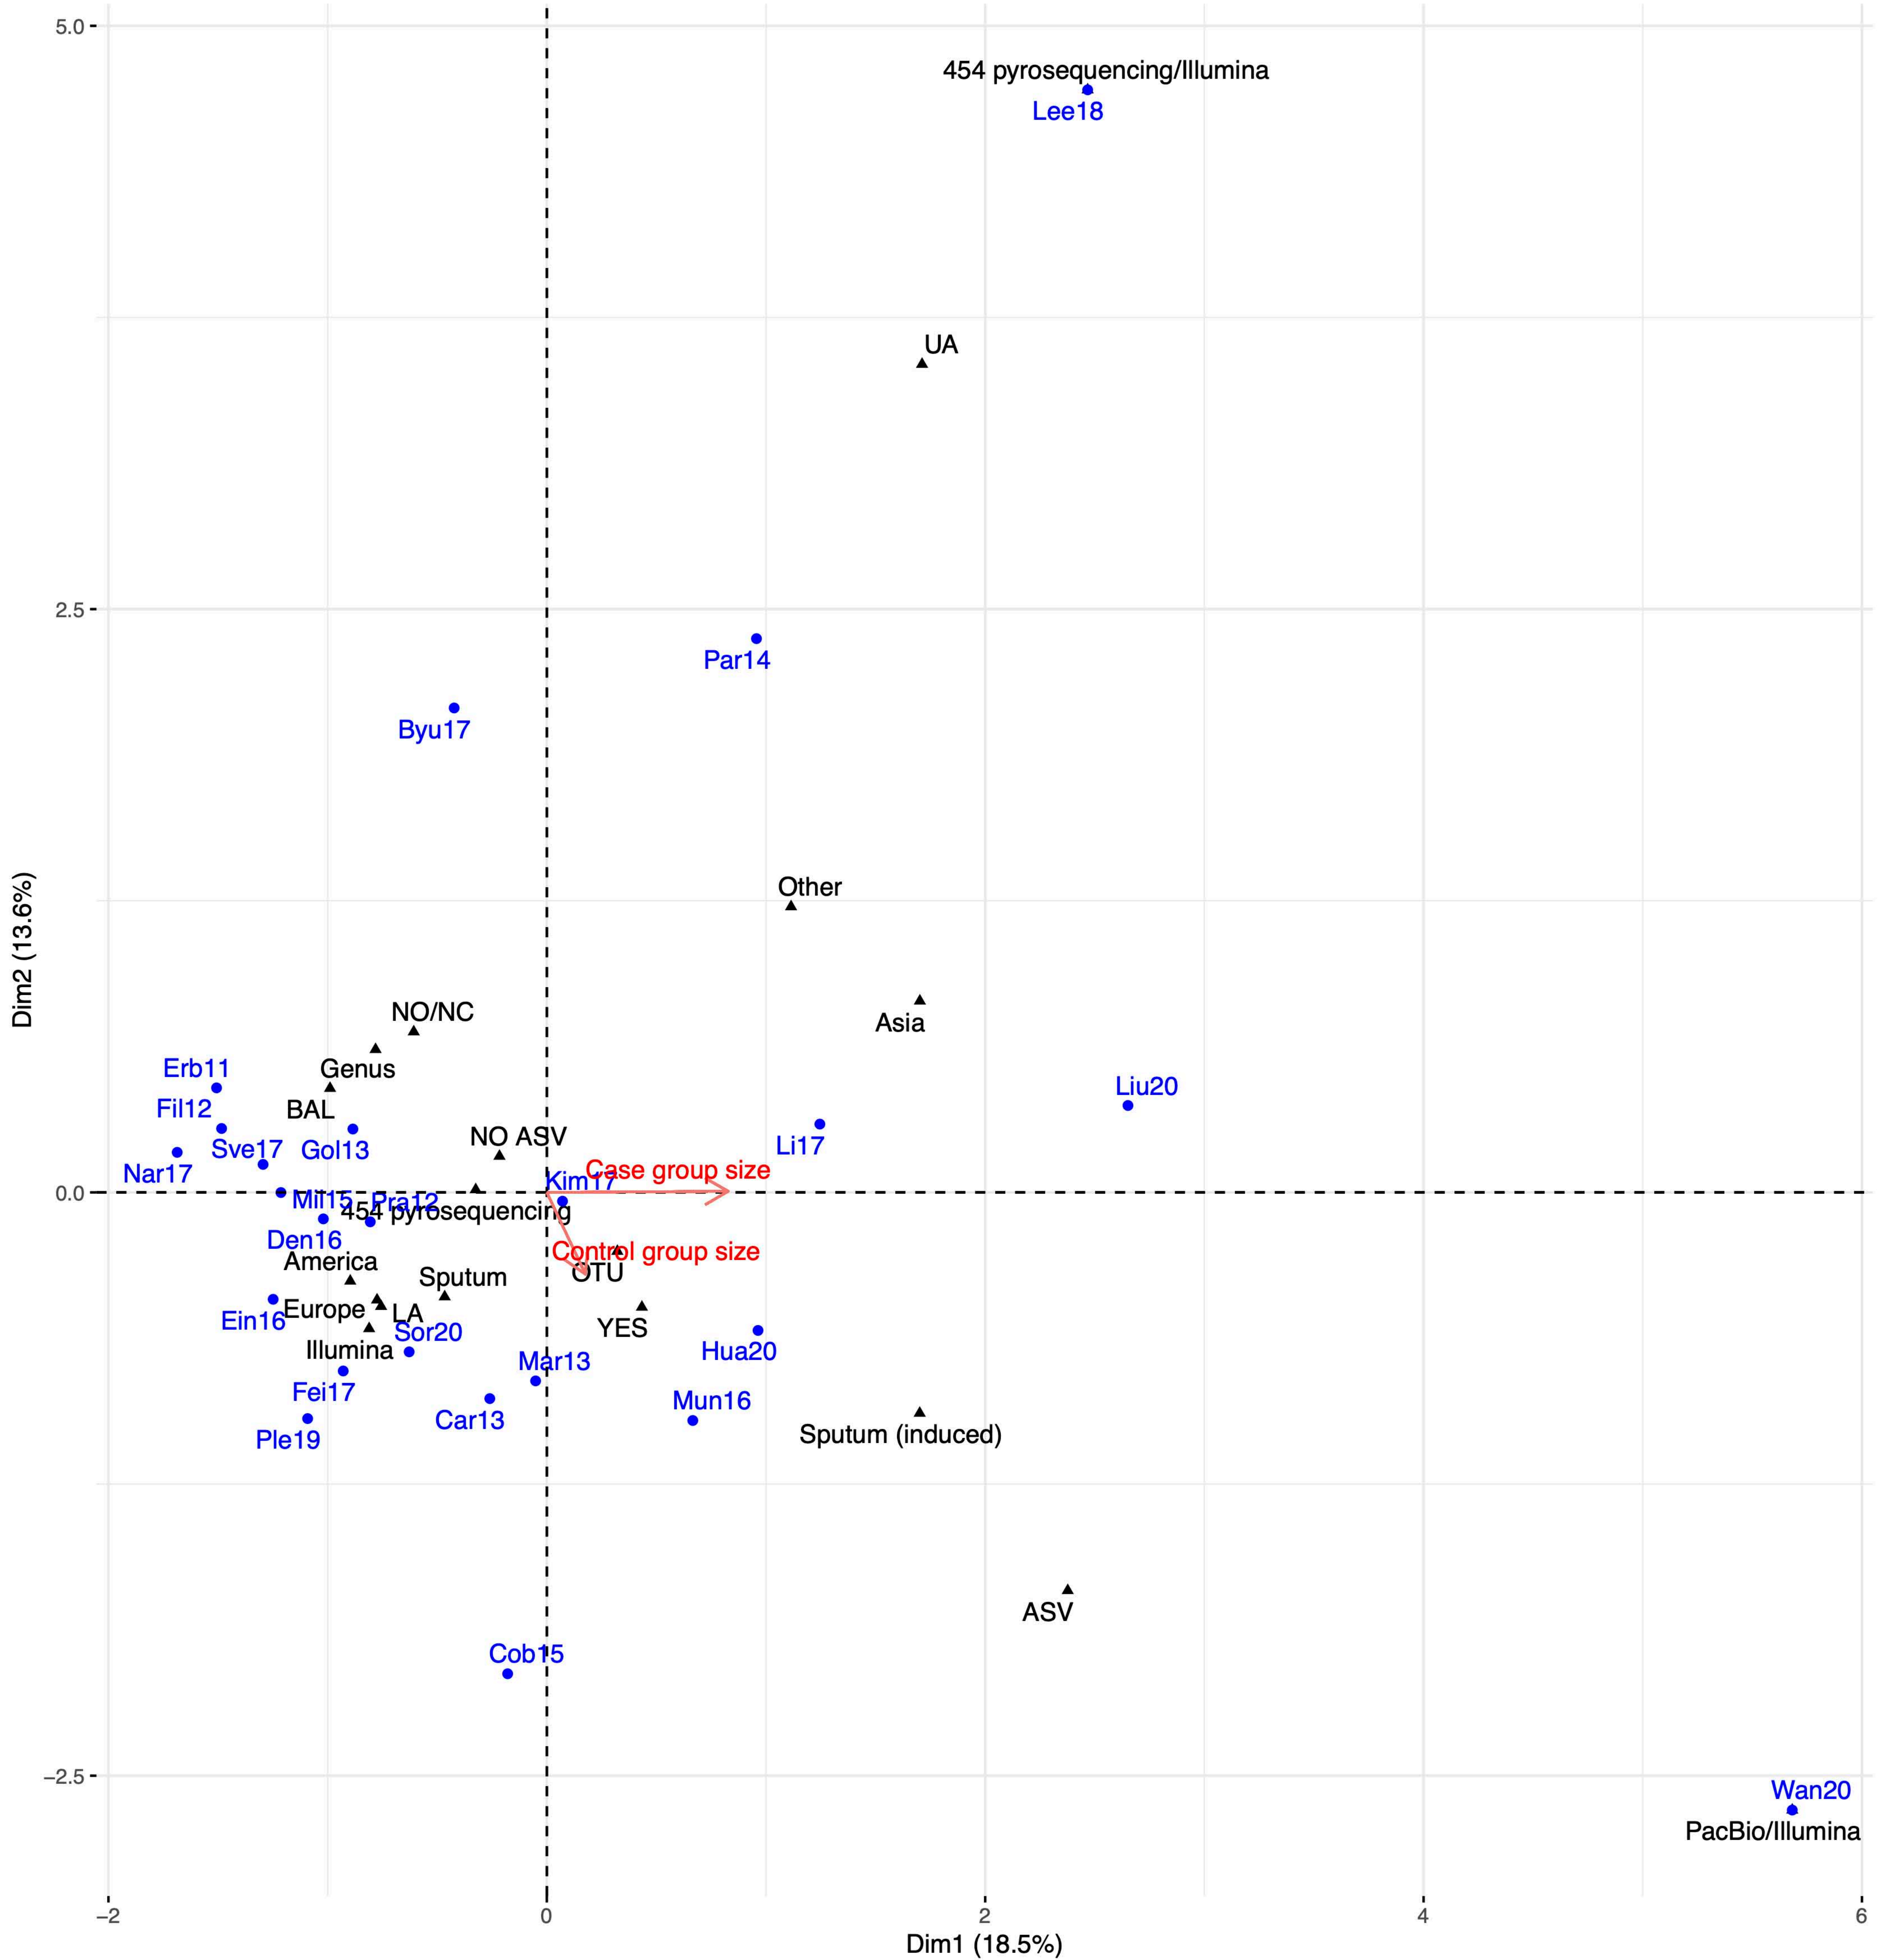

Individuals colored by the size of the case group

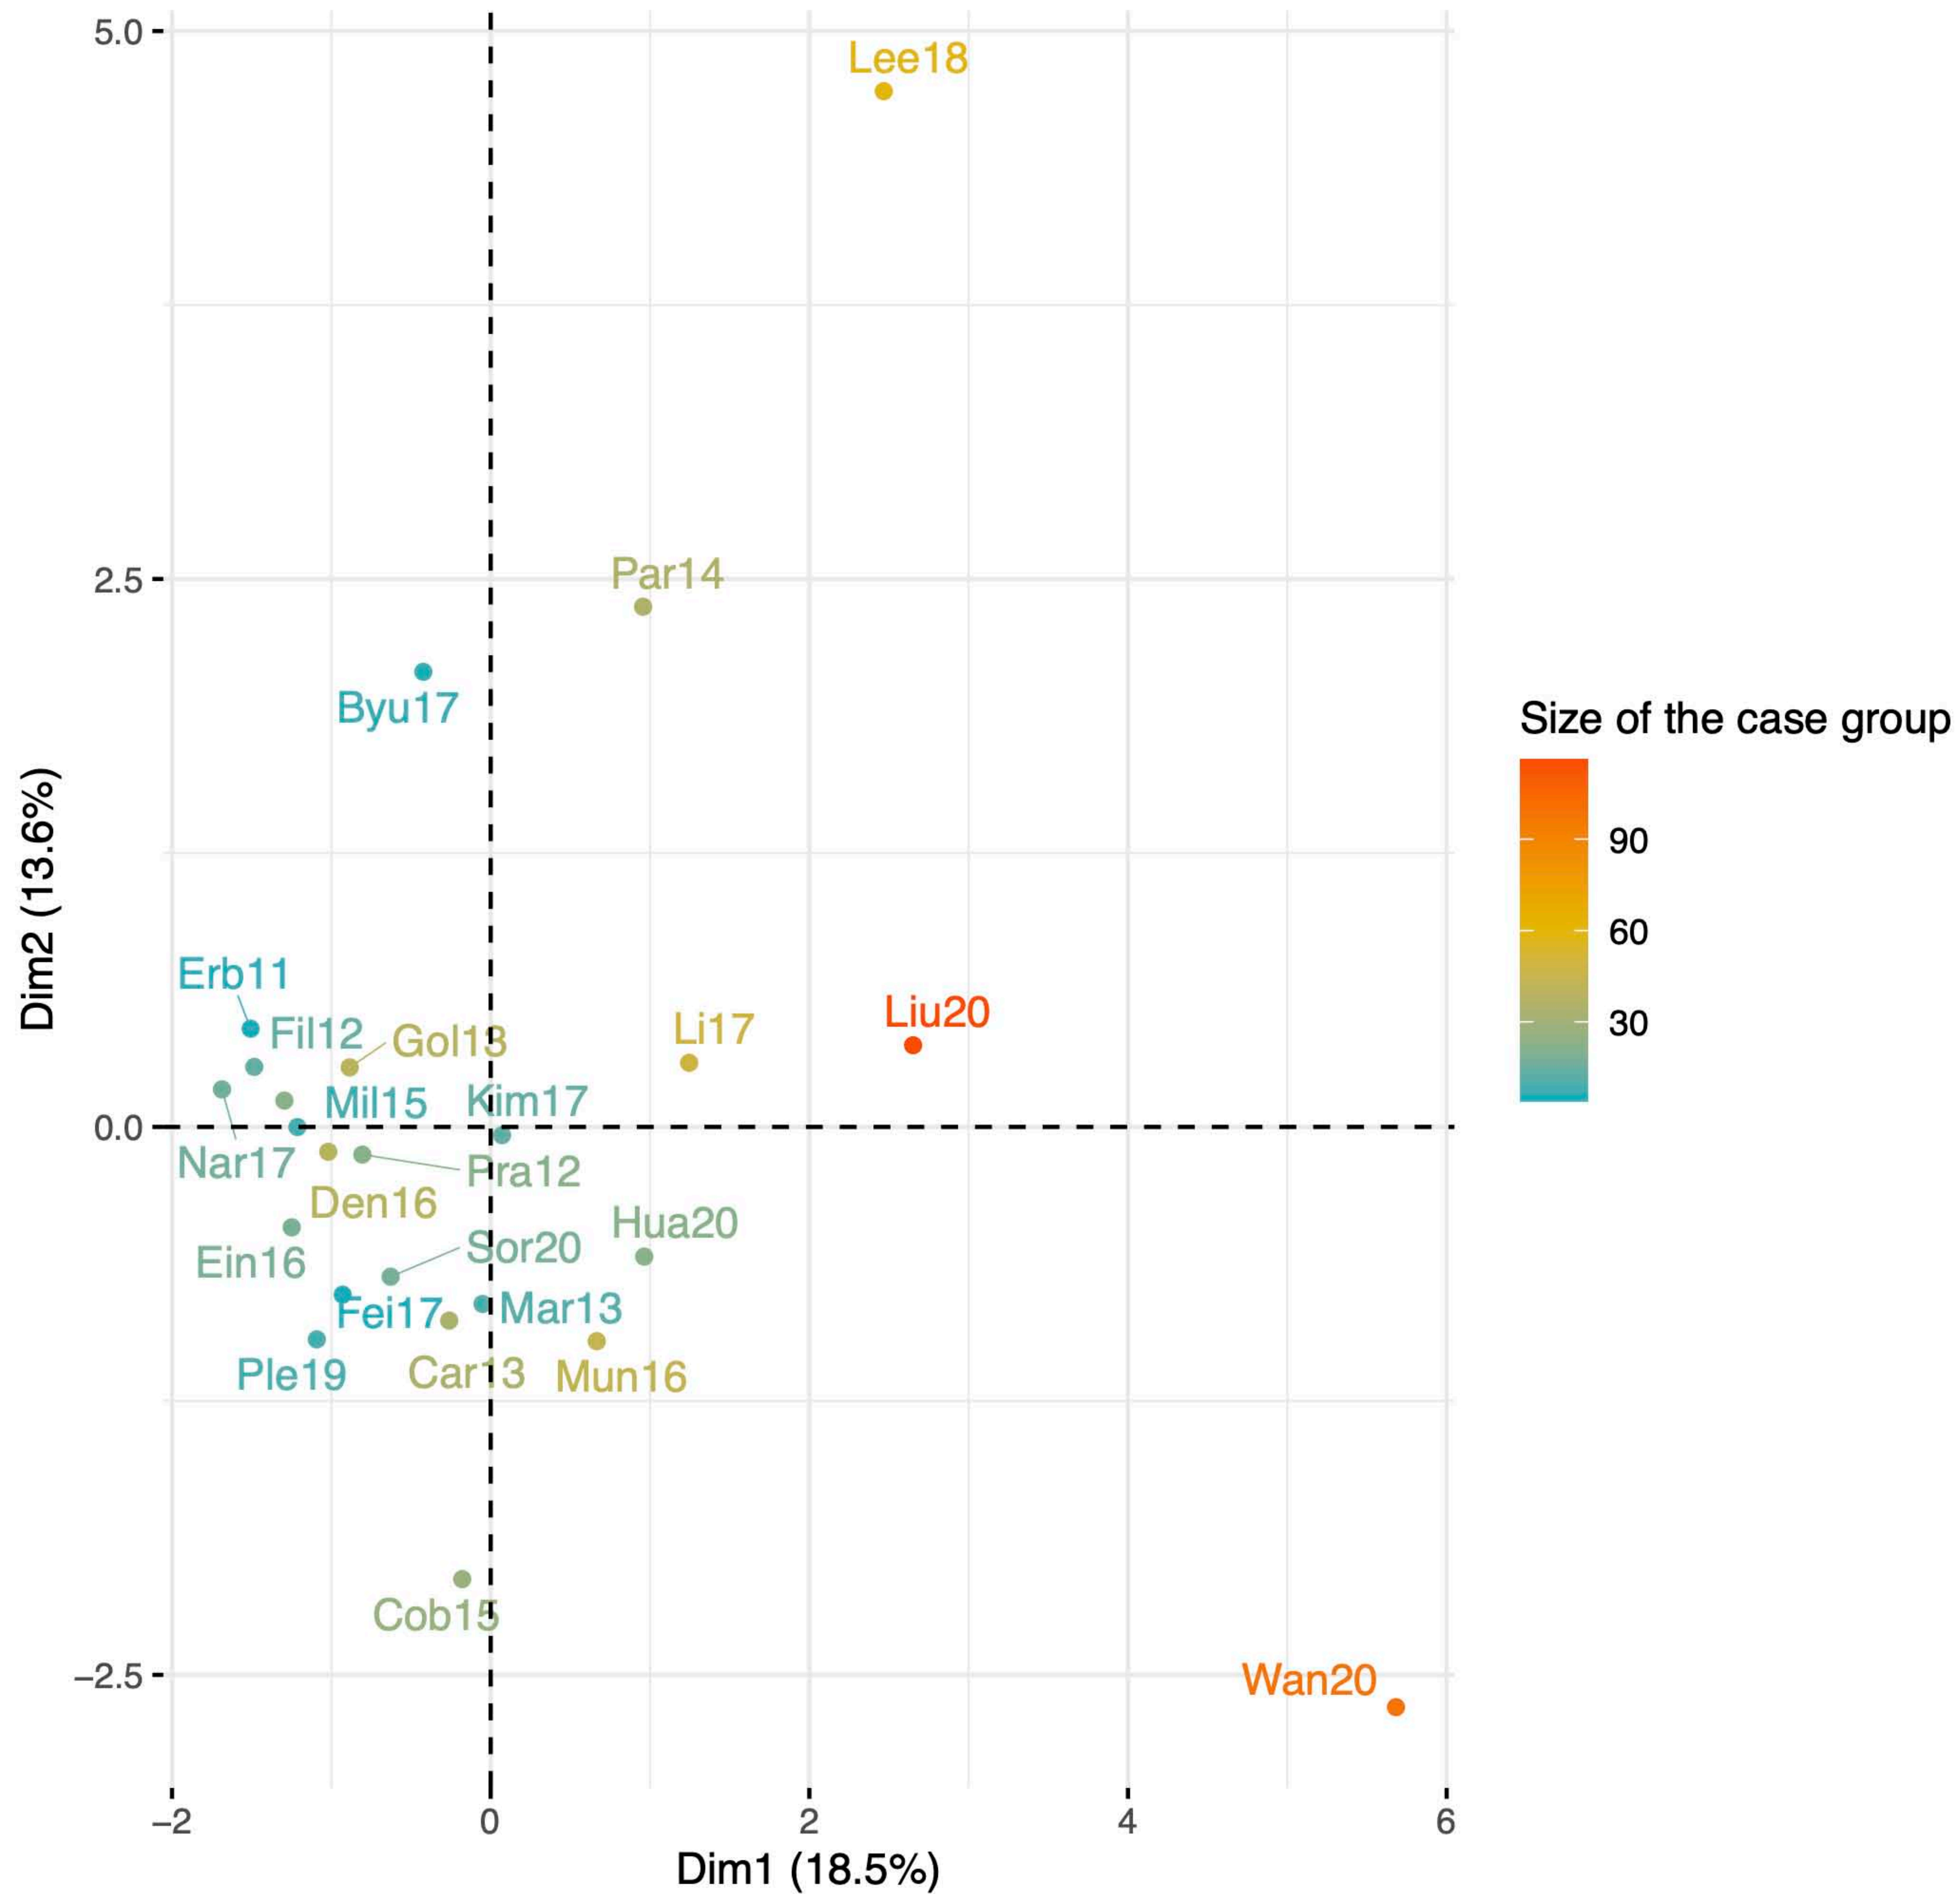

Individuals colored by the size of the control group

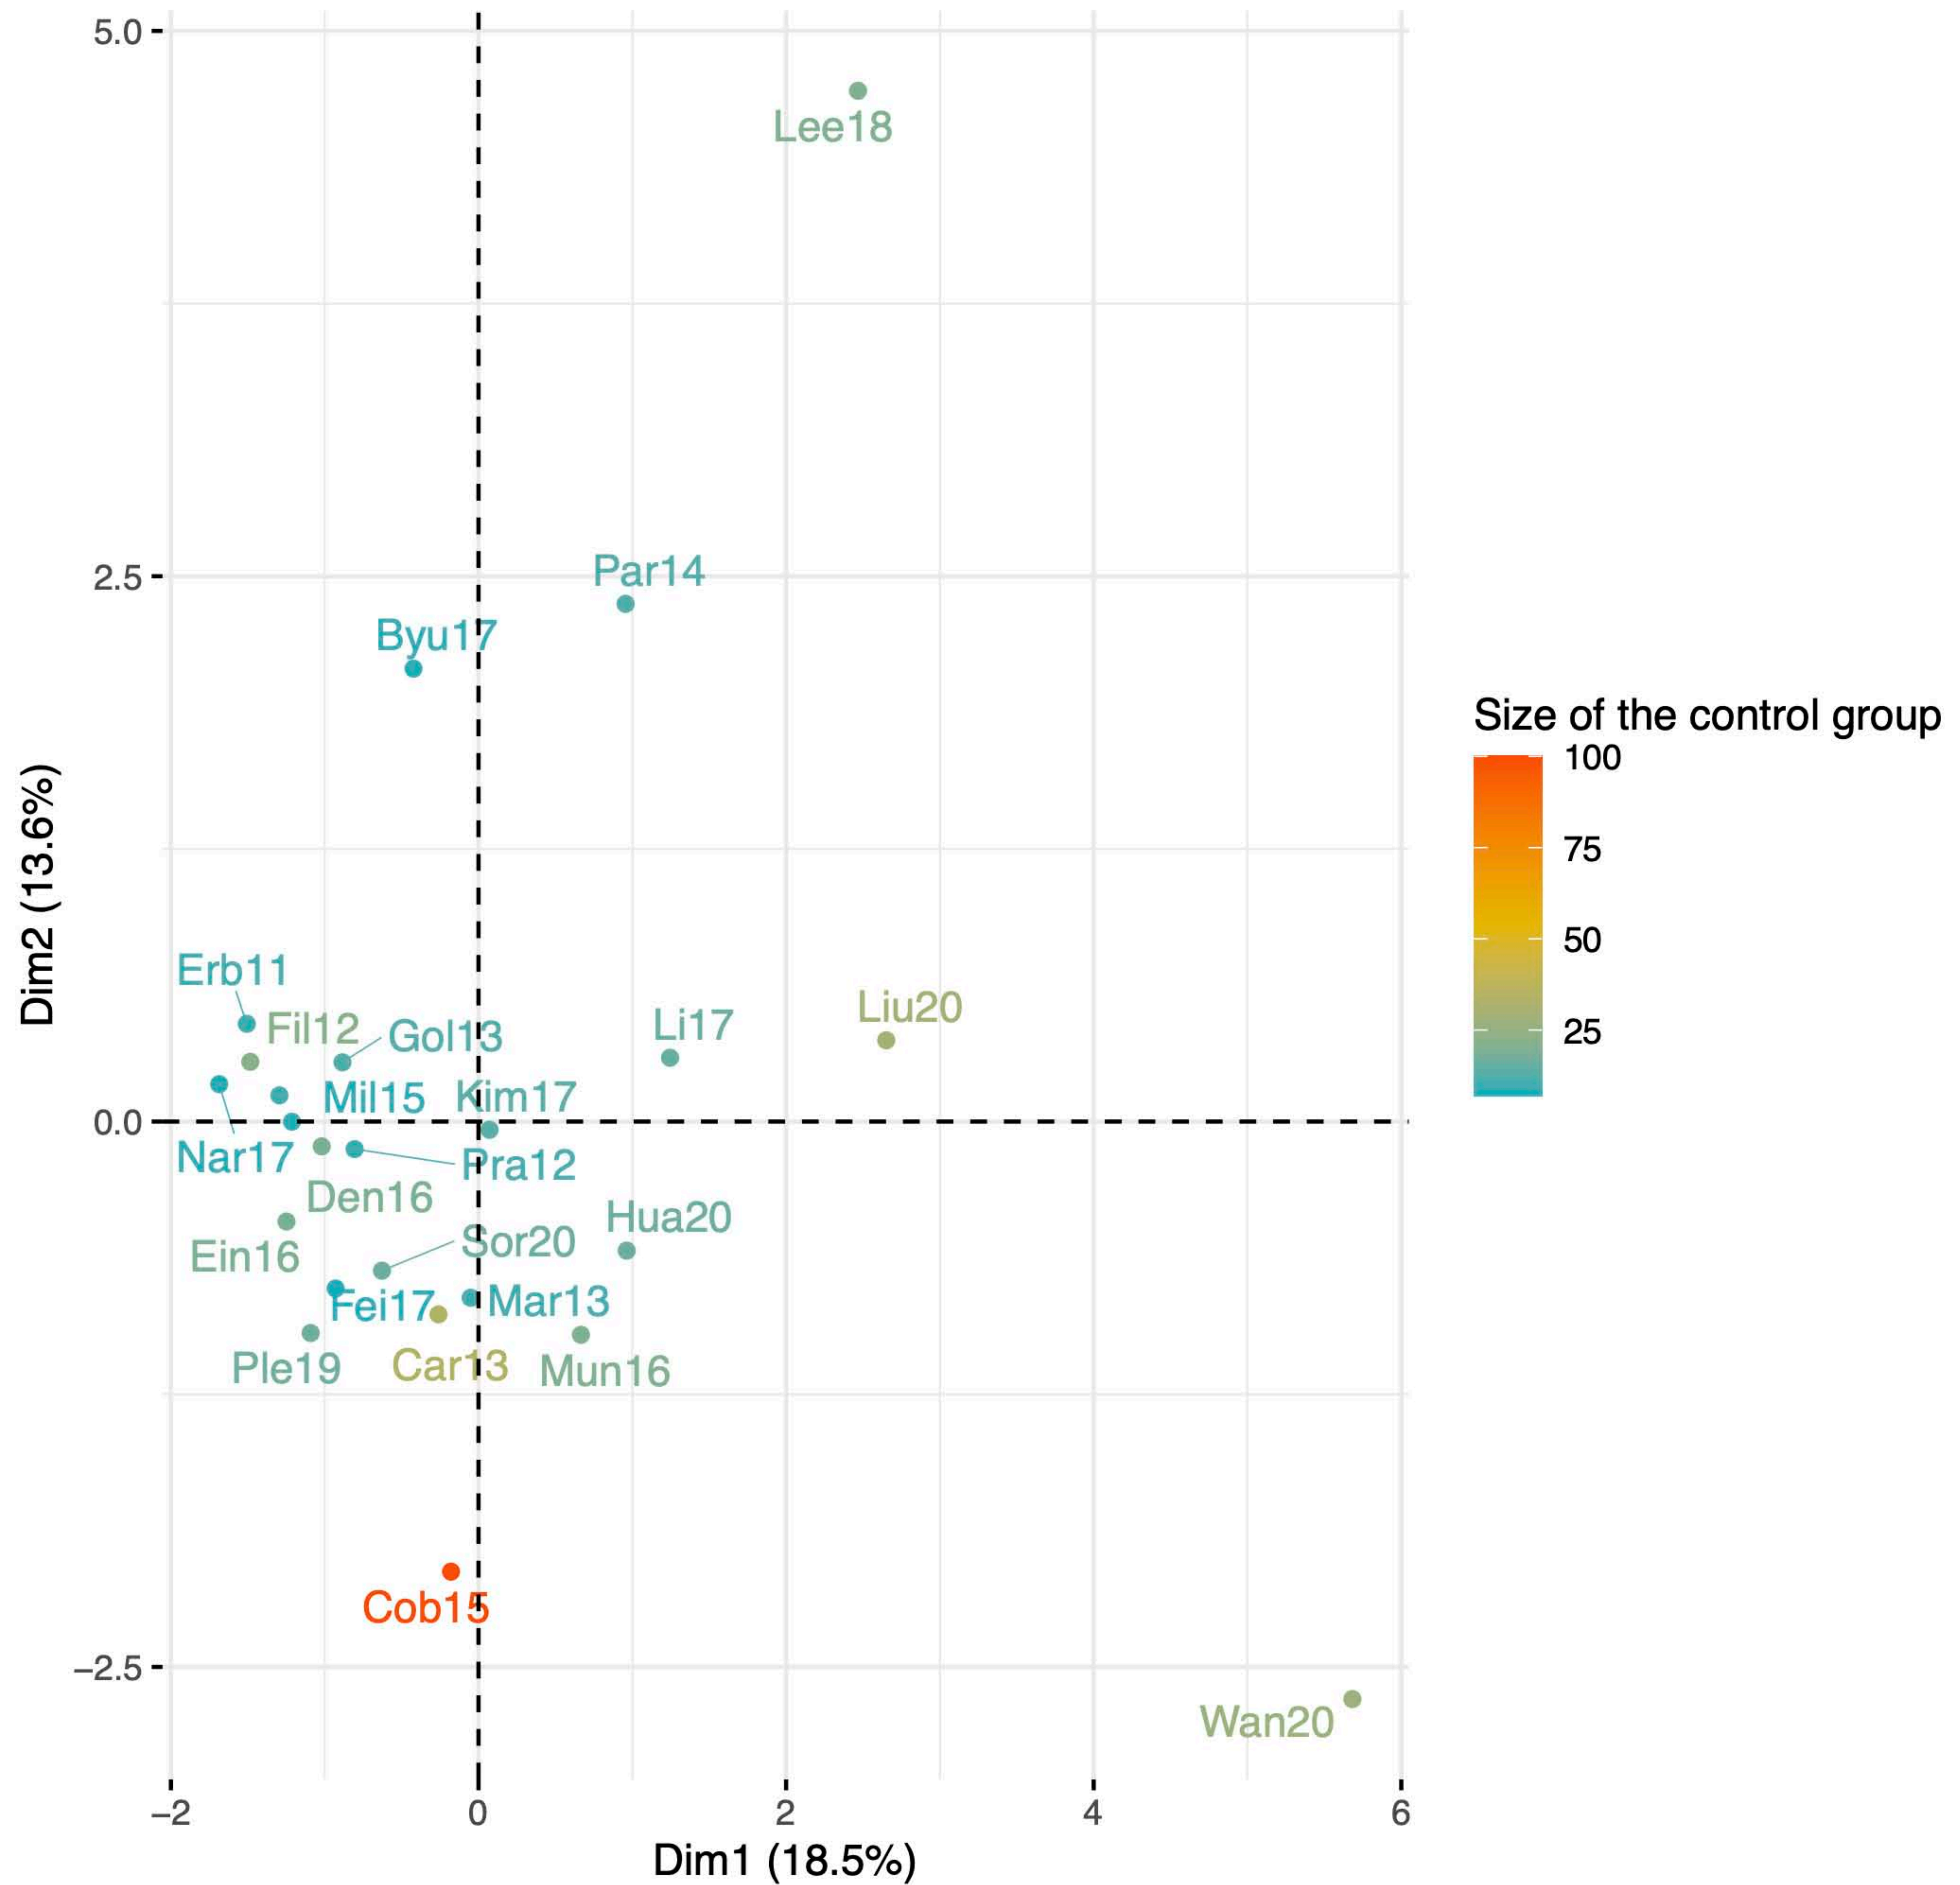

Individuals colored by the type of sample

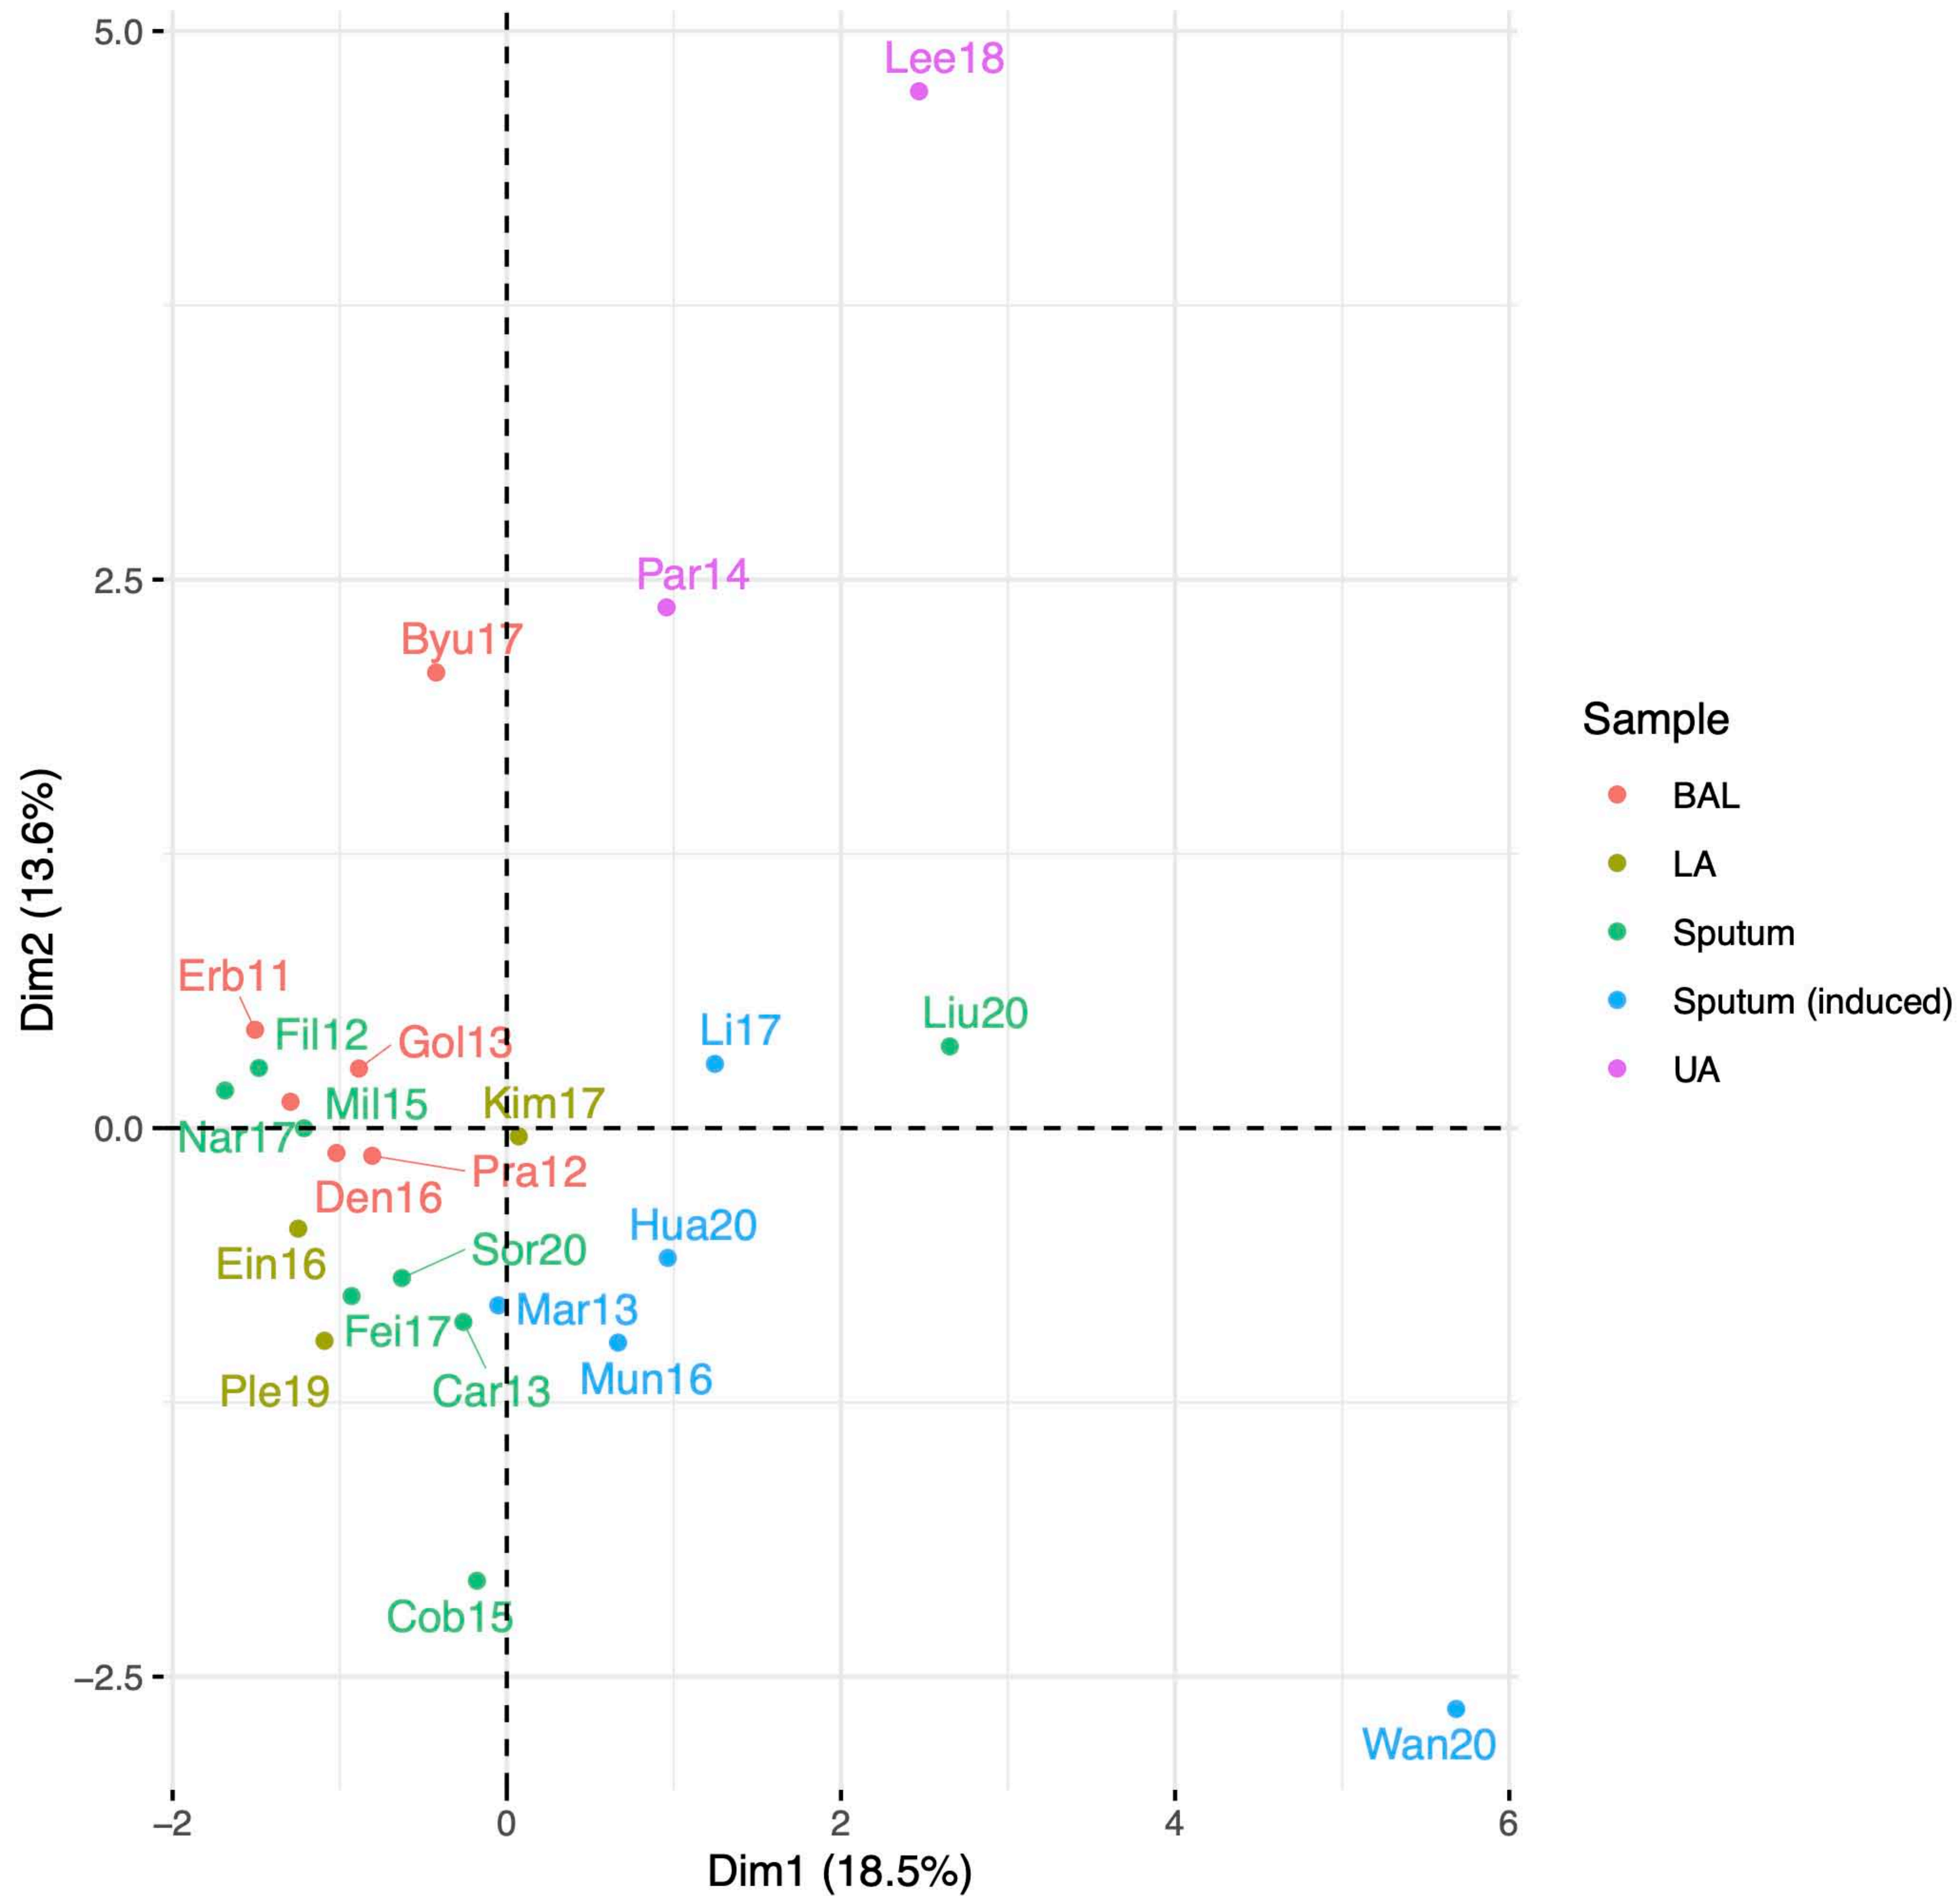



Individuals colored by the continent

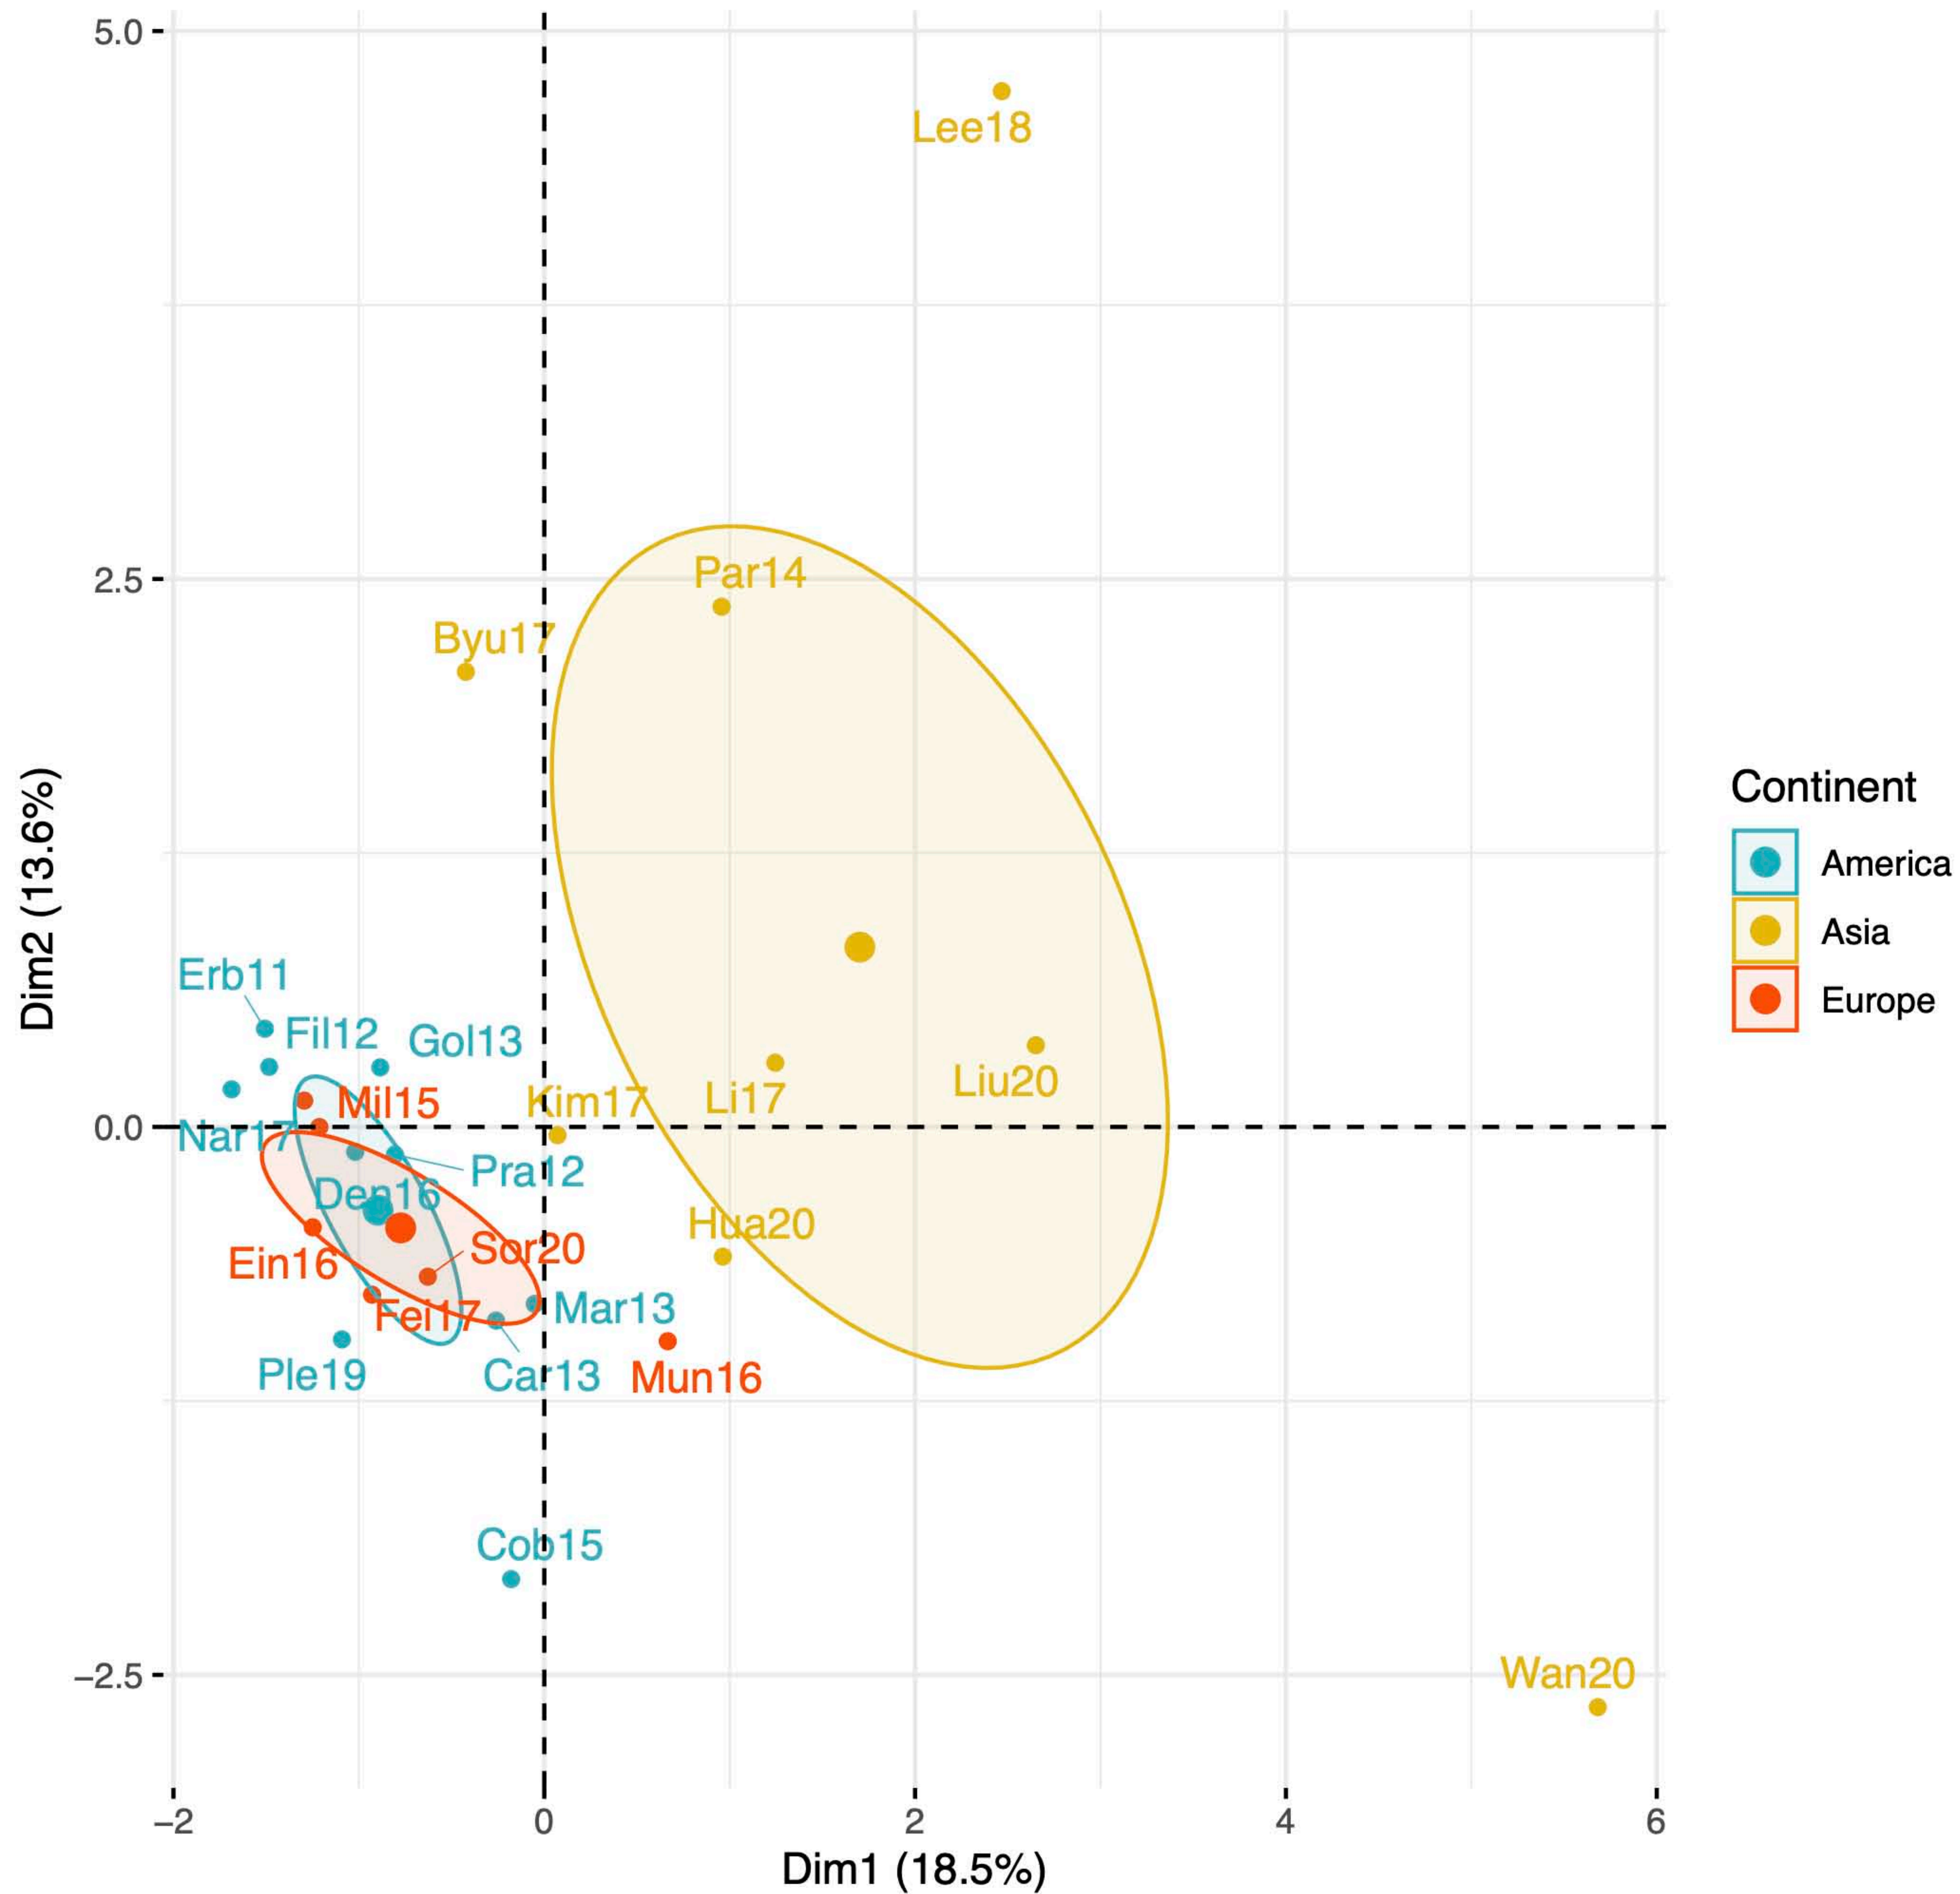

Individuals colored by the sequencing

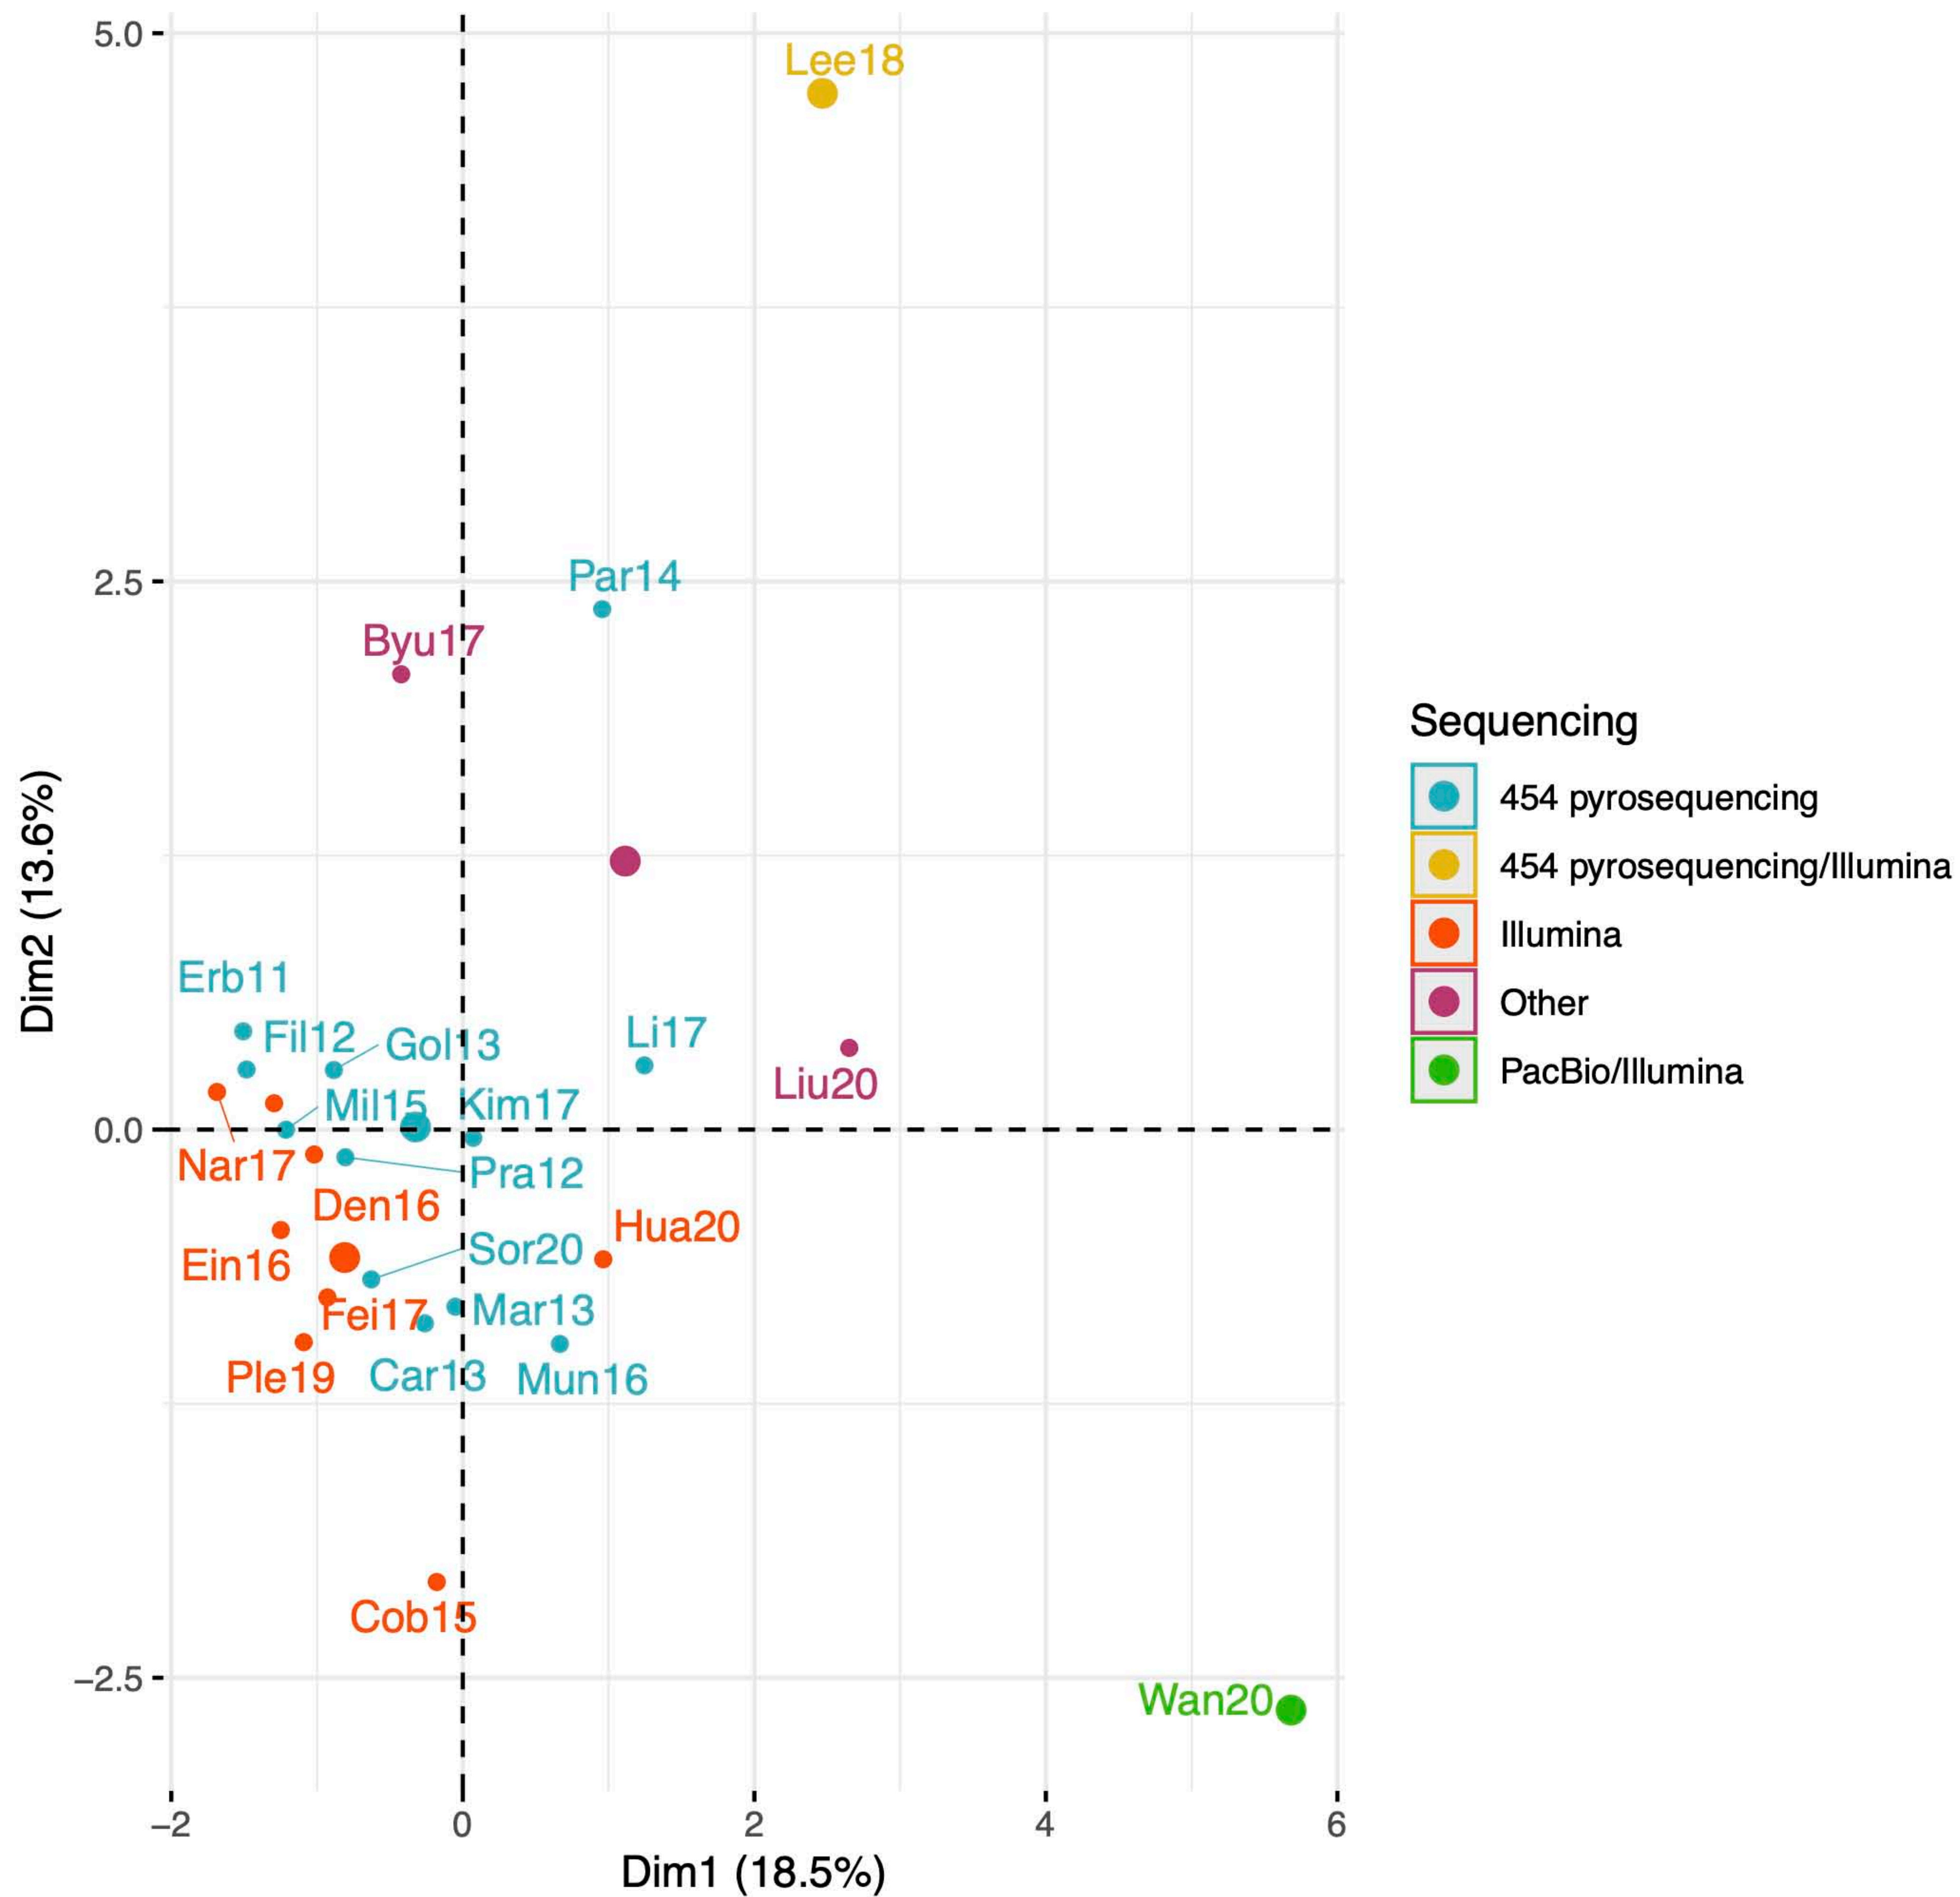

Individuals colored by the rarefaction

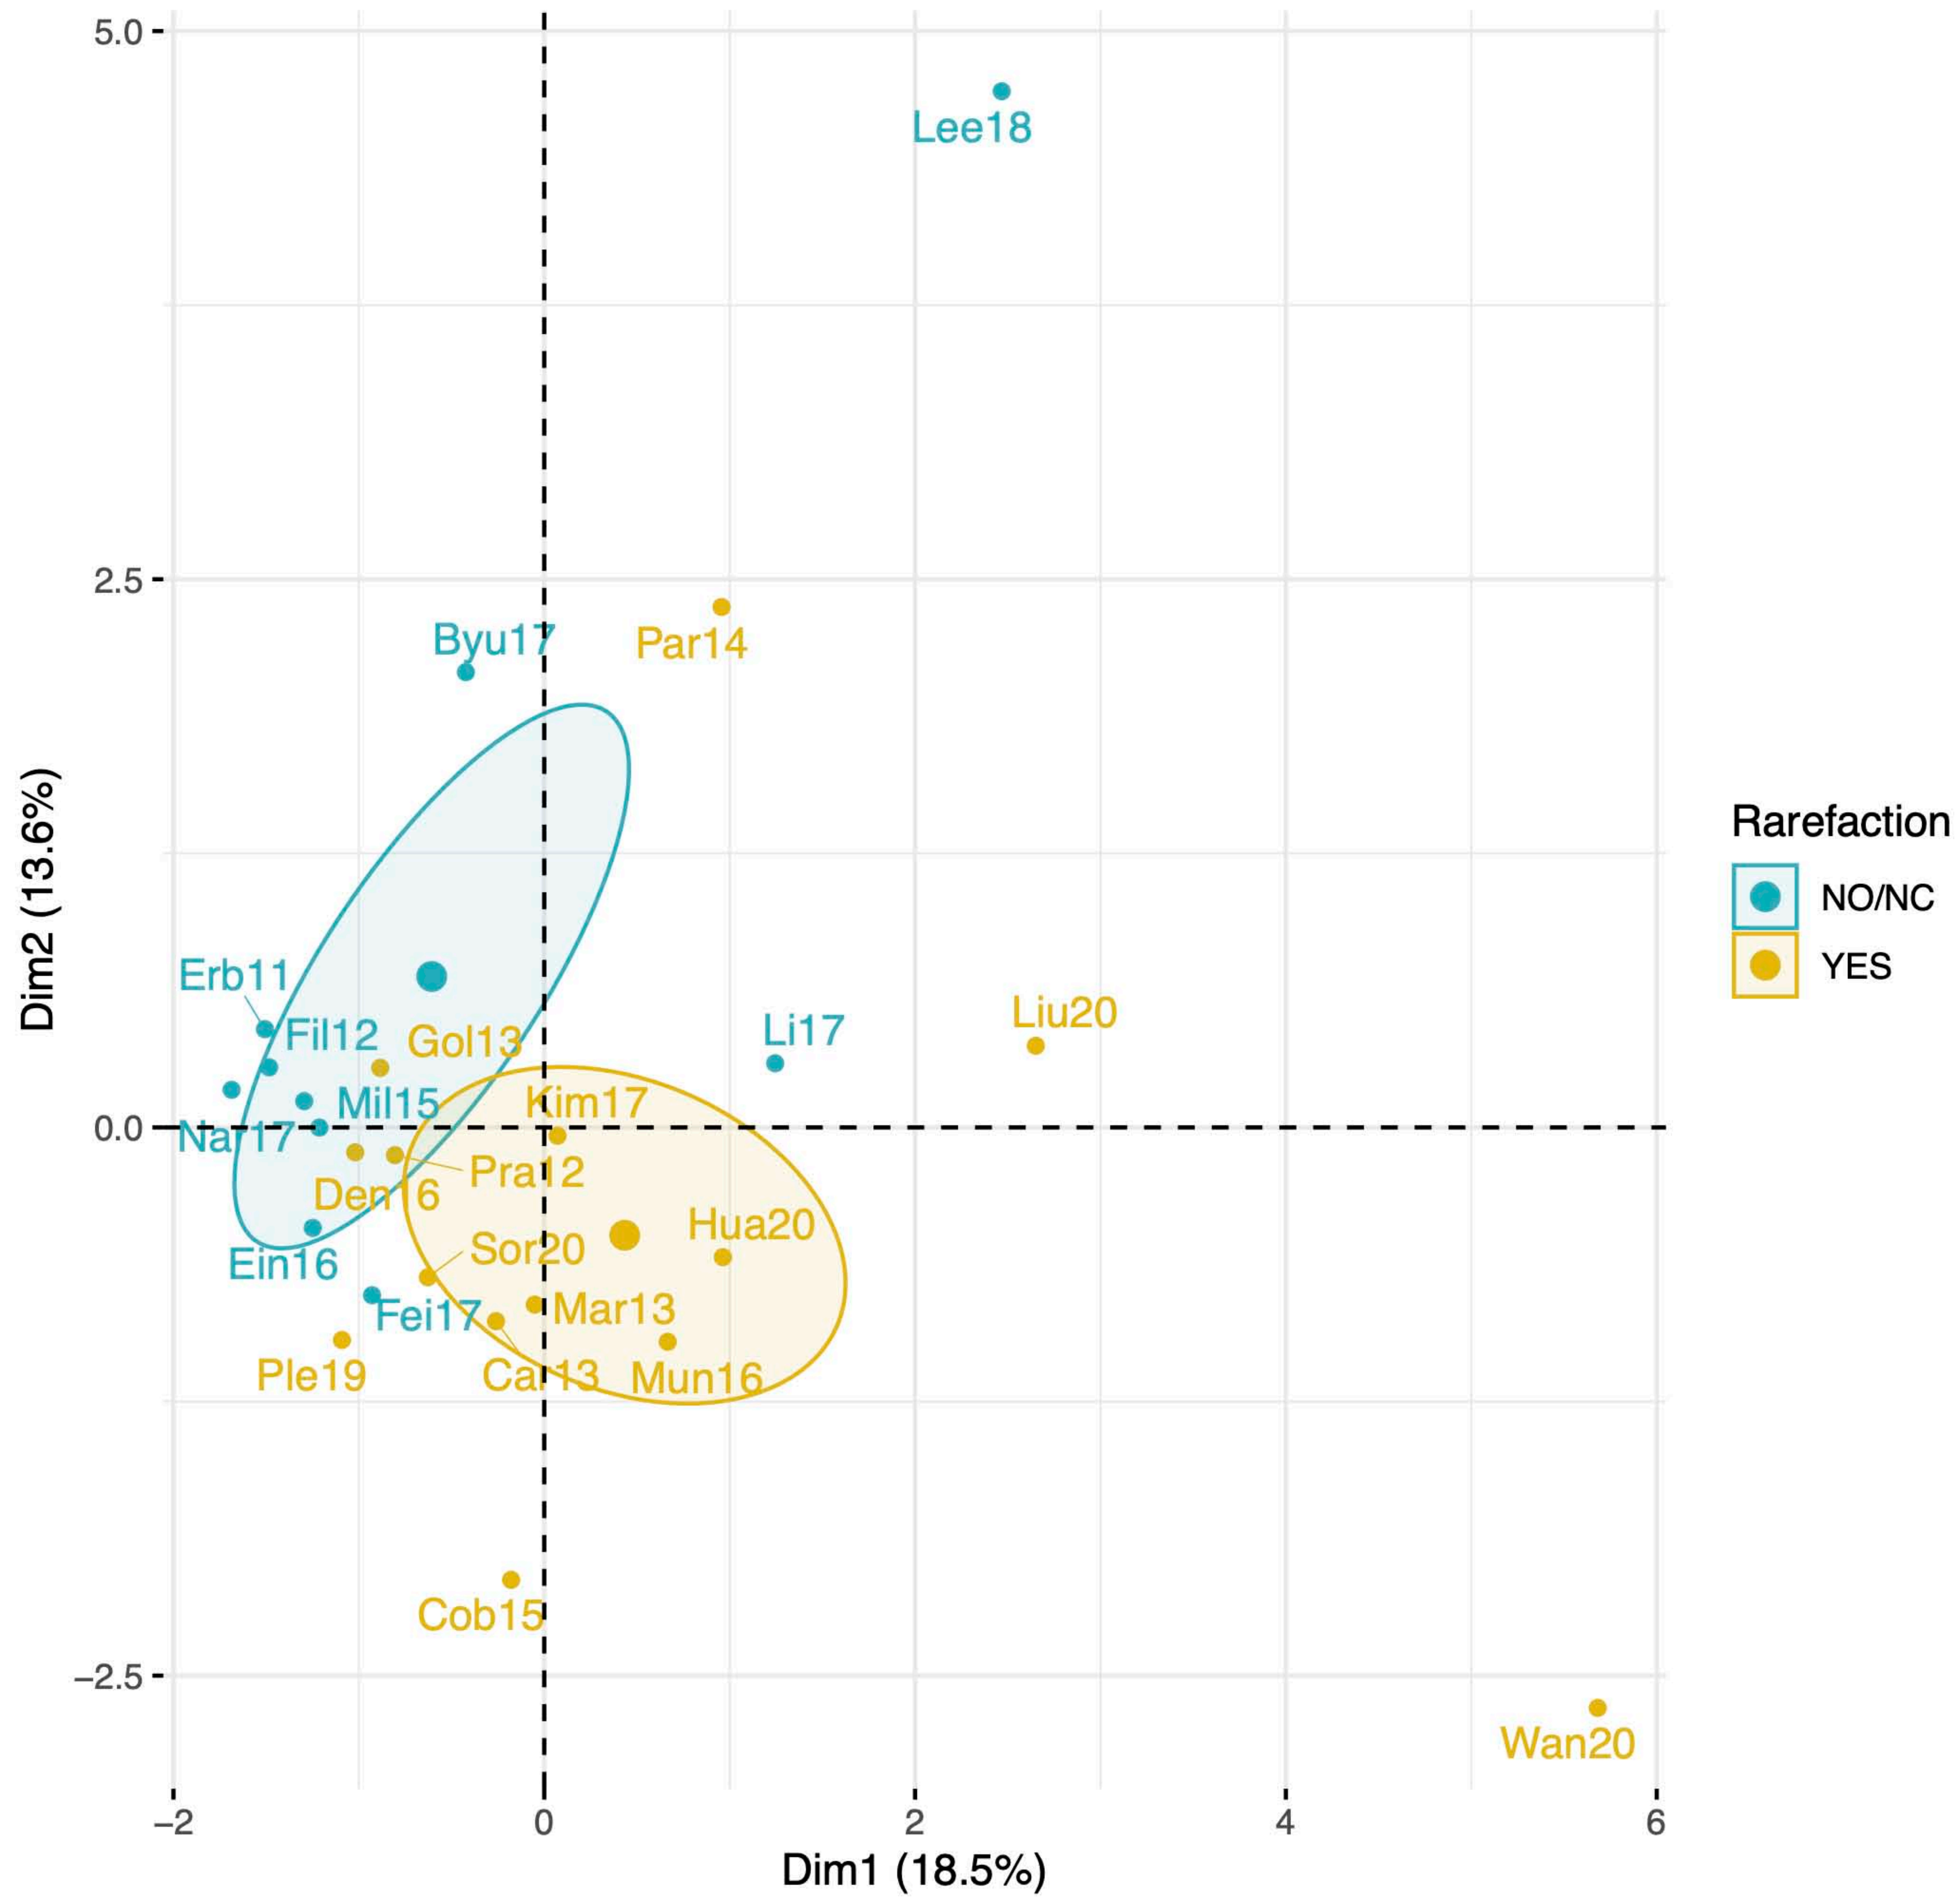

Individuals colored by the taxonomic level

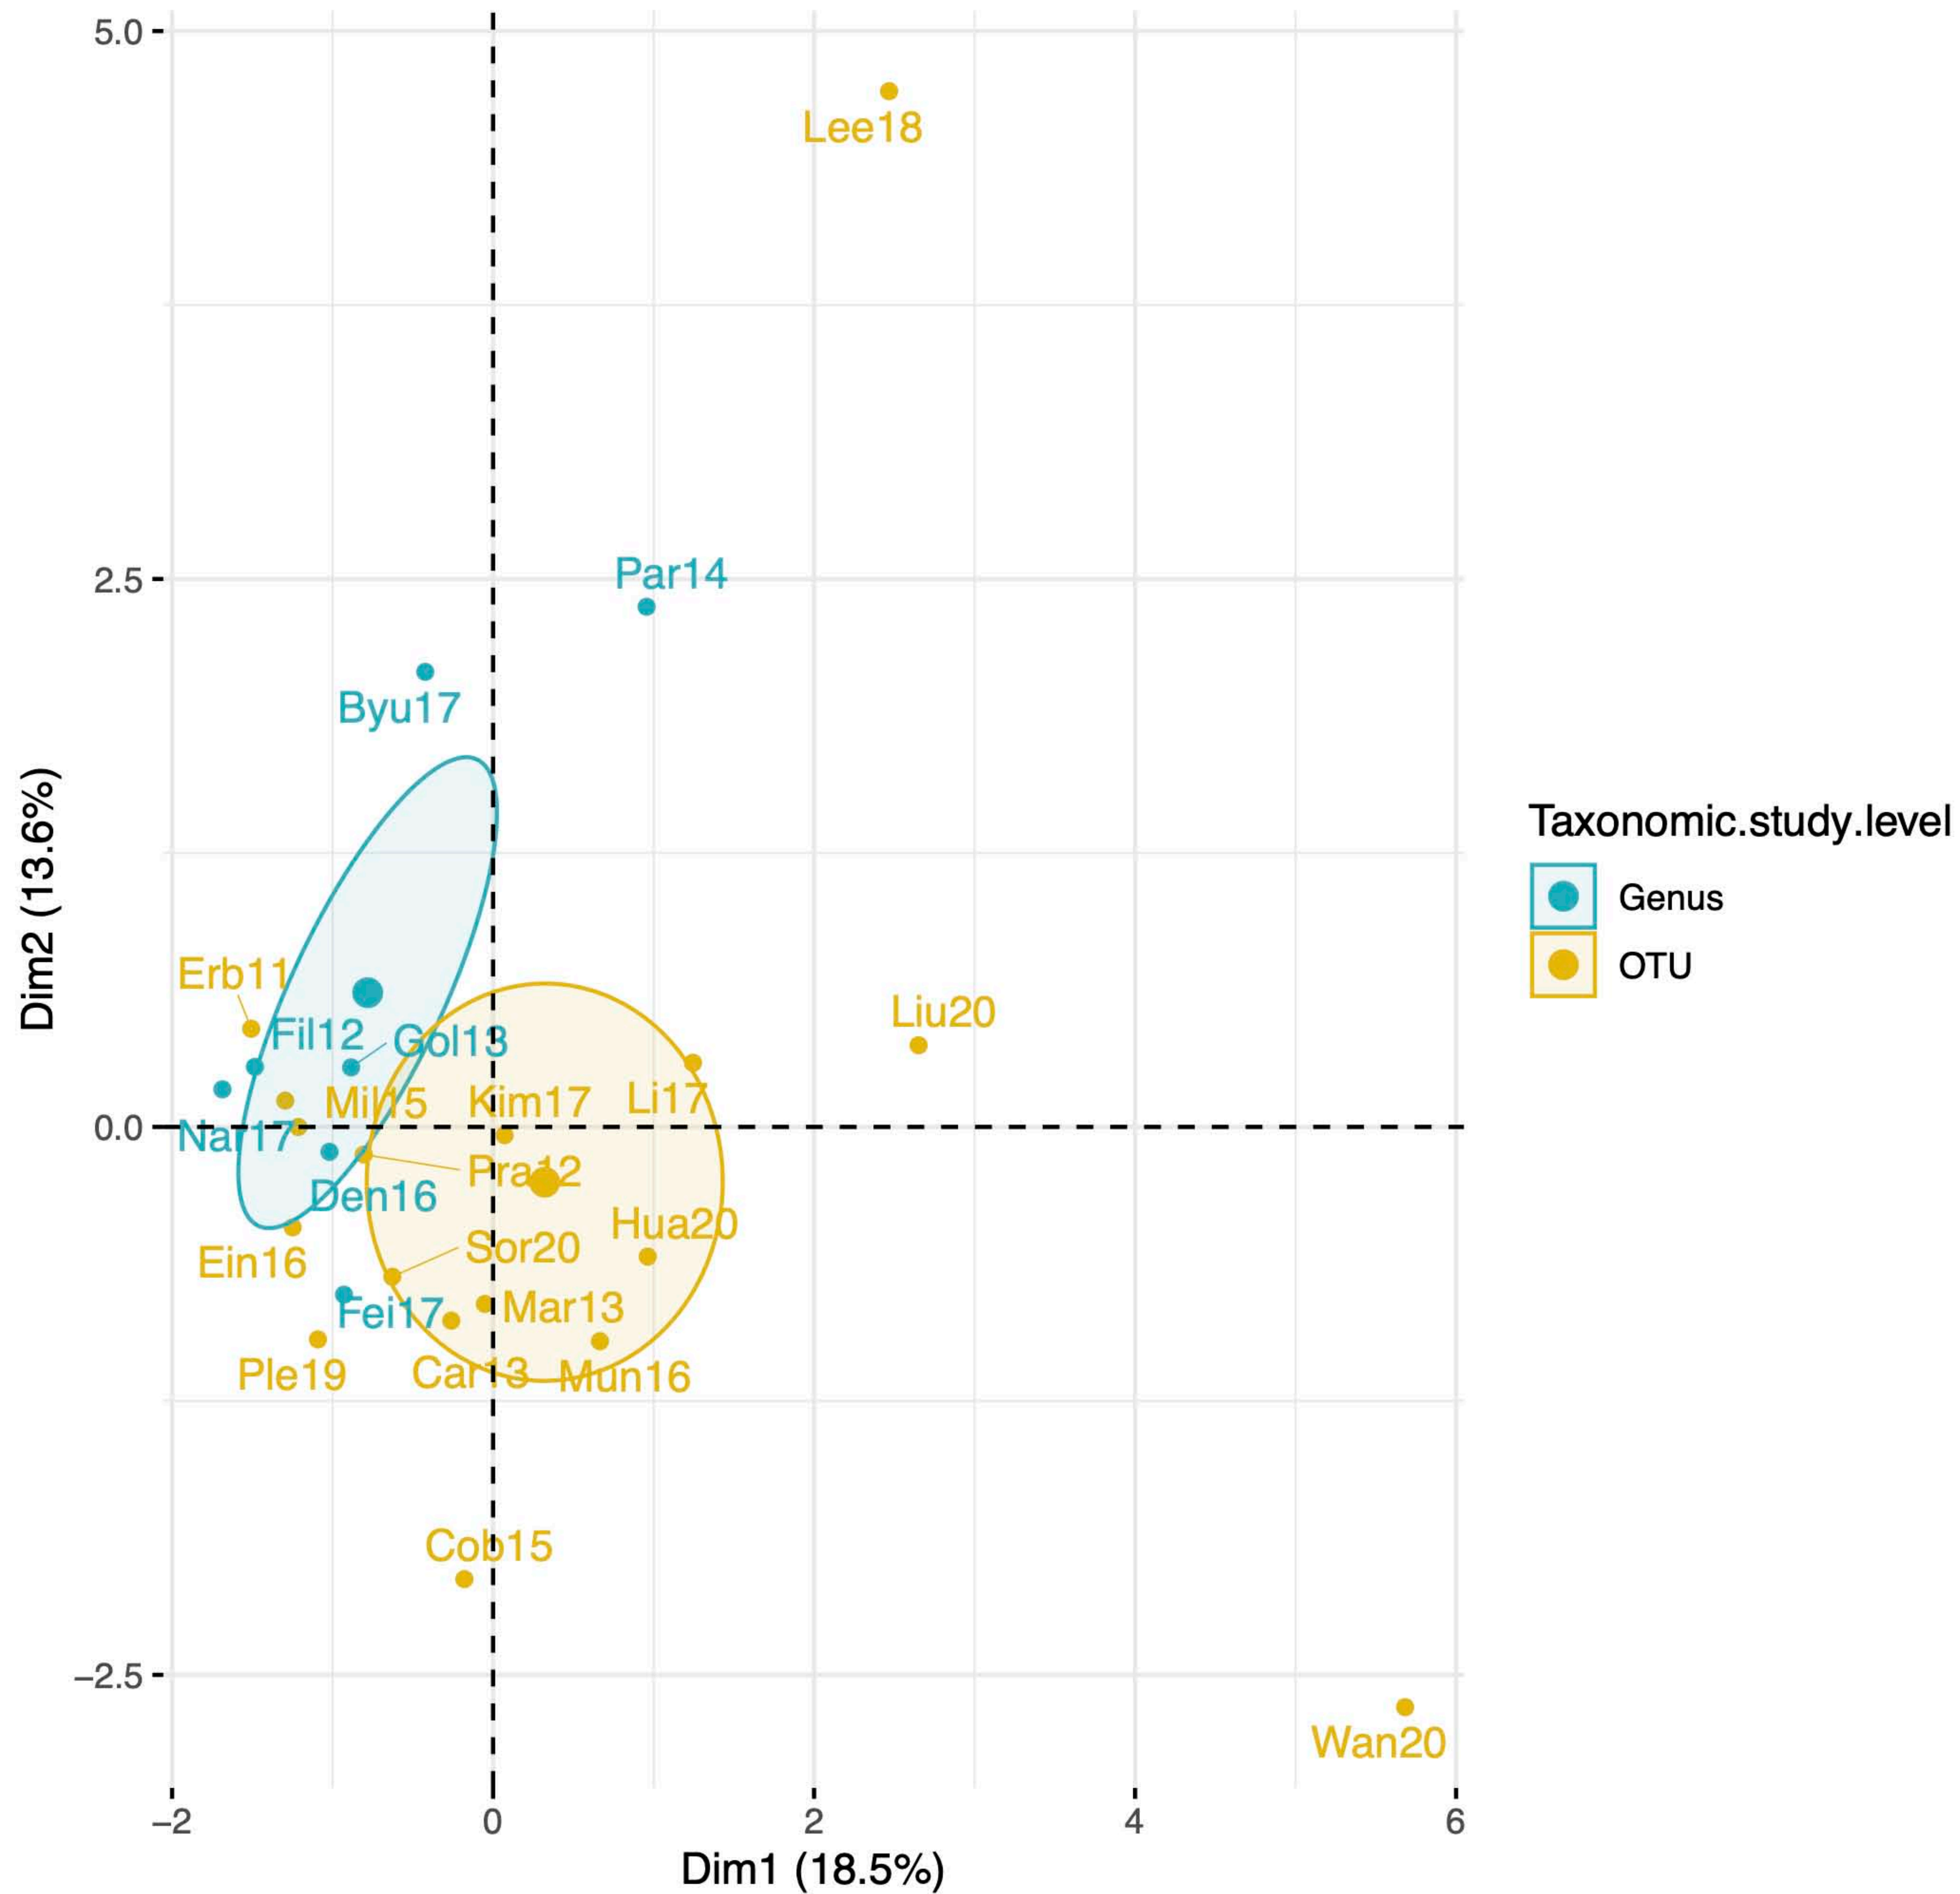

Individuals colored by the ASV method

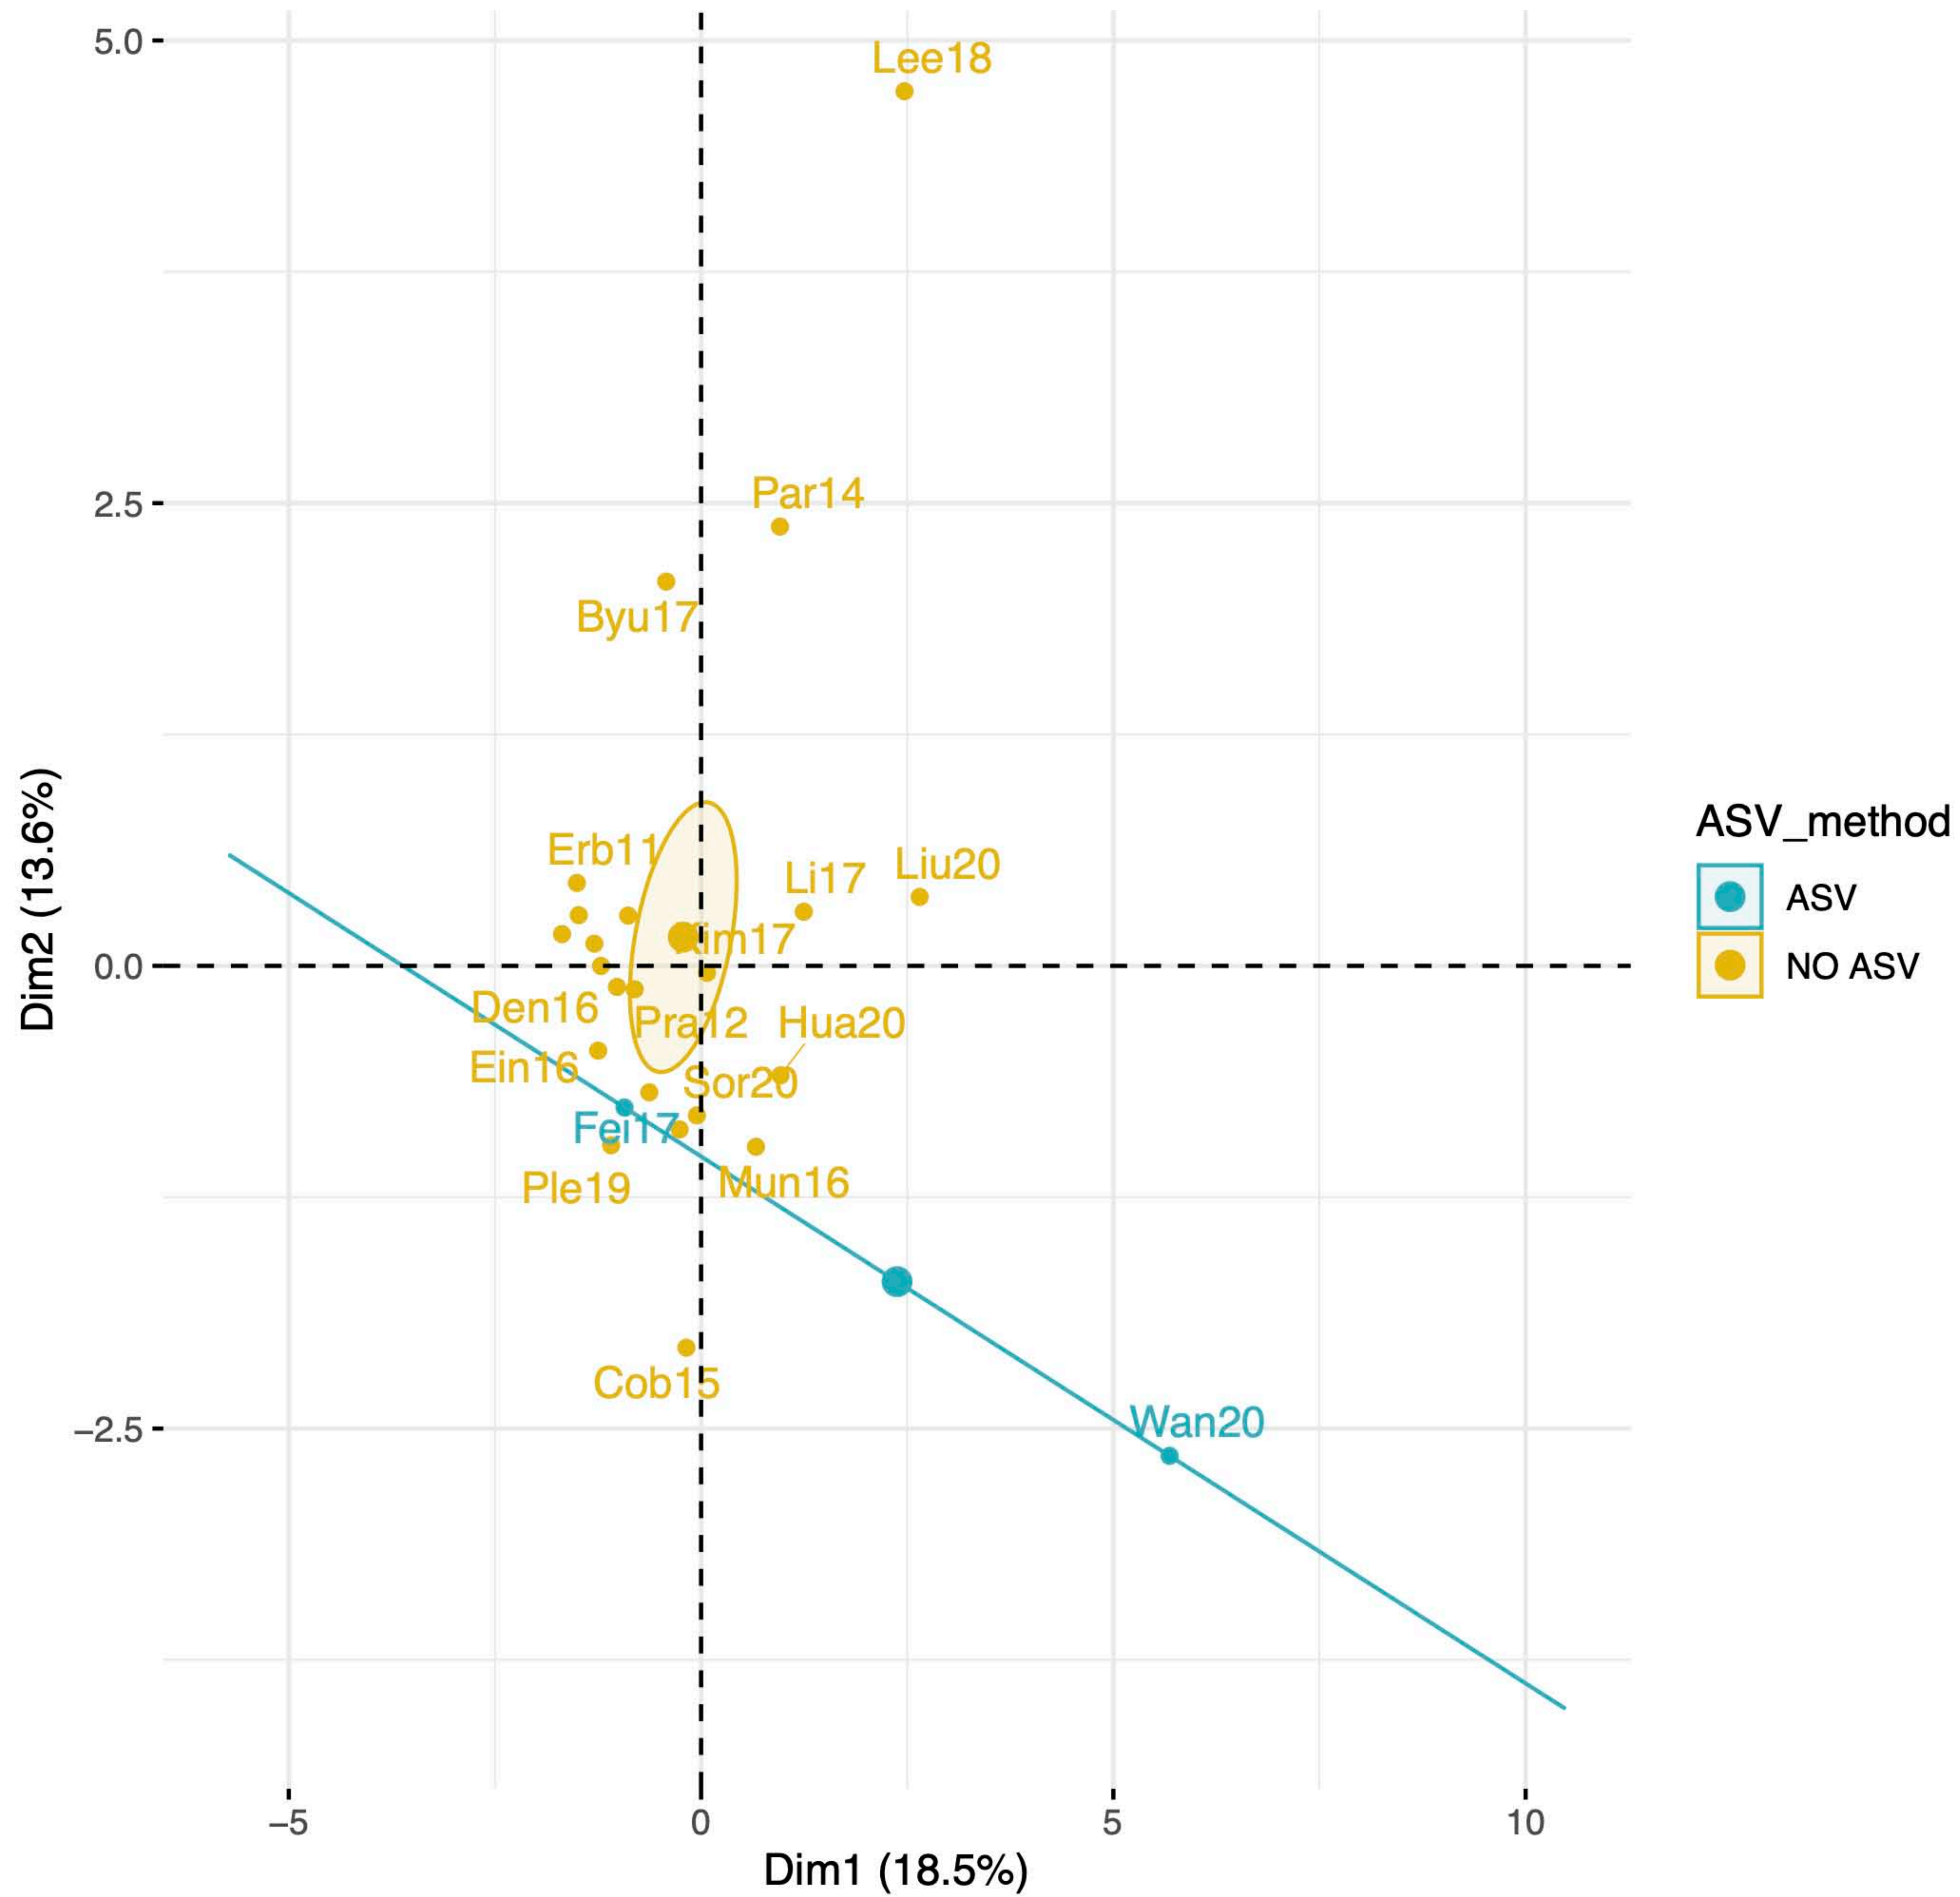

Individuals colored by the sum of expert assessments

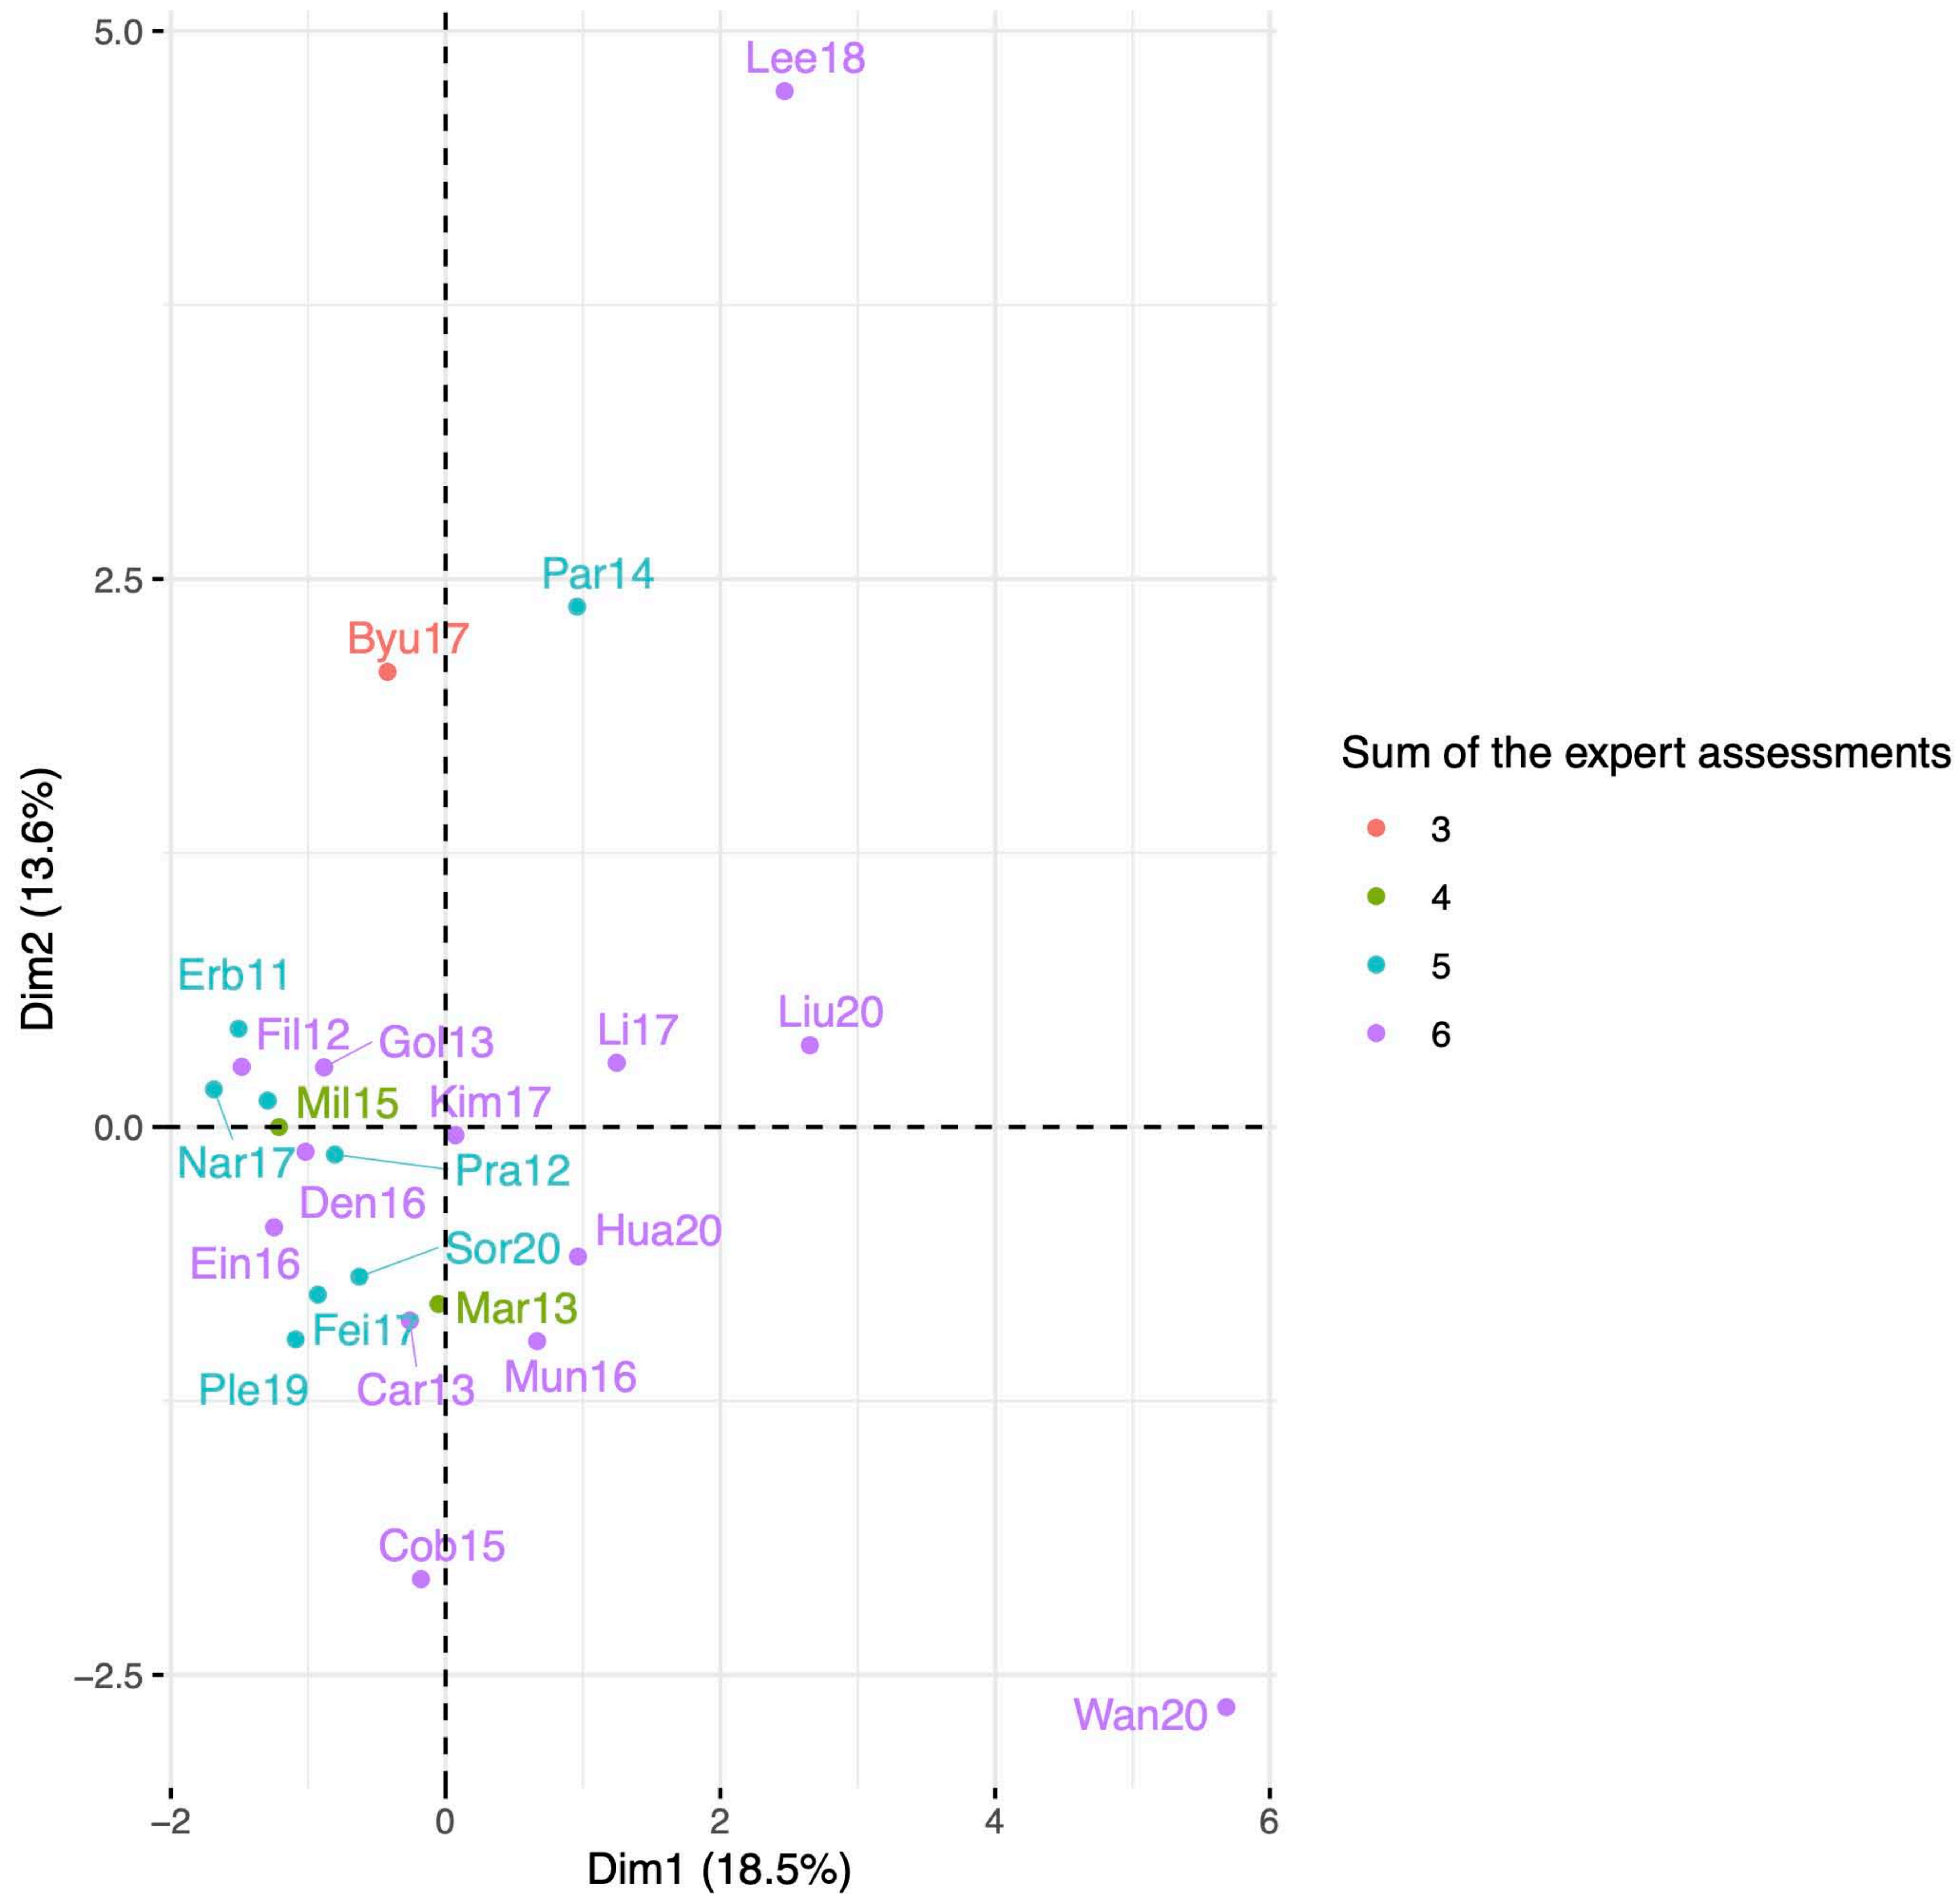

Supplement: 12931_2022_2132_MOESM1_ESM.pdf [file 12931_2022_2132_MOESM1_ESM.pdf]
